1 **Finding valuable bioactive components from Jerusalem artichoke (*Helianthus tuberosus* L.)**  
2 **leaf protein concentrate in a green biorefinery concept**

3  
4 László Kaszás<sup>a\*</sup>, Tarek Alshaal<sup>a,b</sup>, Hassan El-Ramady<sup>a,b</sup>, Zoltán Kovács<sup>a</sup>, Judit Koroknai<sup>a</sup>,  
5 Nevien Elhawat<sup>a,c</sup>, Éva Nagy<sup>a</sup>, Zoltán Cziáky<sup>d</sup>, Miklós Fári<sup>a</sup>, Éva Domokos-Szabolcsy<sup>a</sup>

6  
7 <sup>a</sup> *Agricultural Botany, Plant Physiology and Biotechnology Department, University of Debrecen,*  
8 *Debrecen, Hungary ([kaszas.laszlo@agr.unideb.hu](mailto:kaszas.laszlo@agr.unideb.hu); [kovacs.zoltan@agr.unideb.hu](mailto:kovacs.zoltan@agr.unideb.hu);*  
9 *[nagyeva0116@gmail.com](mailto:nagyeva0116@gmail.com); [fari@agr.unideb.hu](mailto:fari@agr.unideb.hu);*  
10 *[koroknaij@agr.unideb.hu](mailto:koroknaij@agr.unideb.hu); [szabolcsy@agr.unideb.hu](mailto:szabolcsy@agr.unideb.hu))*

11 <sup>b</sup> *Soil and Water Department, Faculty of Agriculture, University of Kafrelsheikh, Kafr El-Sheikh,*  
12 *Egypt ([ramady2000@gmail.com](mailto:ramady2000@gmail.com); [alshaaltarek@gmail.com](mailto:alshaaltarek@gmail.com))*

13 <sup>c</sup> *Department of Biological and Environmental Sciences, Faculty of Home Economic, Al-Azhar*  
14 *University, Egypt ([nevienelhawat@gmail.com](mailto:nevienelhawat@gmail.com))*

15 <sup>d</sup> *Agricultural and Molecular Research and Service Institute, University of Nyíregyháza,*  
16 *Nyíregyháza, Hungary ([cziaky.zoltan@nye.hu](mailto:cziaky.zoltan@nye.hu))*

17 \* *Corresponding author: László Kaszás, University of Debrecen, Debrecen, Hungary; E-mail*  
18 *address: [kaszas.laszlo@agr.unideb.hu](mailto:kaszas.laszlo@agr.unideb.hu)*

19 **Abstract**

20 Jerusalem artichoke is widely known for its inulin-enriched tubers. Recently the opportunity has  
21 been arisen to involve the whole plant in biorefinery concept due to its high lignocellulose  
22 biomass and tuber production. This paper focuses on the repeatedly harvestable green biomass of  
23 Jerusalem artichoke. Ultra-High Performance Liquid Chromatography-Electrospray  
24 Ionization/Mass Spectrometry (UHPLC-ESI-MS) was applied to identify the phytochemicals in  
25 Jerusalem artichoke leaf protein concentrate (JAPC) thermally extracted from green biomass of  
26 three clones, i.e., Alba, Fuseau and Kalevala. Amino acid and fatty acid profiles as well as yield  
27 of JAPC were also analyzed. The UHPLC-ESI-MS analyses showed that no toxic phytochemicals  
28 were identified in JAPC. The results revealed, also, that JAPC is not only essential-amino acids-  
29 rich but also contains substantial amounts of polyunsaturated fatty acids (66-68%) such as

30 linolenic and linoleic acids. Linolenic acid represented 39-43% of total lipid content; moreover,  
31 the ratio between  $\omega$ -6 and  $\omega$ -3 essential fatty acids in JAPC was  $\sim$ 0.6: 1. Using UHPLC-ESI-MS,  
32 the following hydroxylated methoxyflavones were for the first time identified in JAPC, i.e.,  
33 dimethoxy-tetrahydroxyflavone, dihydroxy-methoxyflavone, hymenoxin and nevadensin. These  
34 compounds are medically important since they are referred to as anti-cancer, anti-inflammatory  
35 and antioxidants. Also, liquiritigenin - estrogenic-like compound - was identified in JAPC  
36 alongside the following terpenes, i.e., loliolide and dihydroactinidiolide. However, no remarkable  
37 differences of phytochemicals, fatty acids and amino acids composition were seen among  
38 Jerusalem artichoke clones. The green biomass of tested clones ranged between 5 to 5.6 kg m<sup>-2</sup>  
39 and JAPC yield varied from 28.6 to 31.2 g DM kg<sup>-1</sup> green biomass with total protein content, on  
40 average, of 33.3%. According to our knowledge, this paper is the first scientific report  
41 highlighting bioactive substances in JAPC such as PUFA phytochemicals. These results clearly  
42 prove that JAPC is a valuable product which can direct towards human and animal nutrition as  
43 well as it can serve as basic material for different industrial purposes.

44 **Keywords:** Jerusalem artichoke; leaf protein concentrate; polyunsaturated fatty acids;  
45 phytochemicals; amino acids;; UHPLC-ESI-MS

## 46 **Introduction**

47 Ensuring an adequate supply of protein has become one of the challenges facing the world today,  
48 which is expected to worsen in the future as a result of the terrible increase in population and the  
49 erosion of agricultural land. The global protein supply relies on vegetal sources (57%), meat  
50 (18%), dairy products (10%), fish and shellfish (6%) and other animal products (9%),  
51 respectively [1]. Depending on species different organs of plants can serve as protein source such

52 as seed (e.g. soy; pea; almond; pea; rice; wheat as seed-based protein), fruit (e.g. cranberry fruit-  
53 based protein), leaf (e.g. moringa leaf-based protein) and root (e.g. maca root-based protein)  
54 [2,3]. Recently, leaf-based protein has gained an intensive attention. Alfalfa and grasses are the  
55 most perspective species in continental climate zone. Alfalfa protein-xanthophyll concentrate  
56 (APC) is an extensively studied processed product of fractionated green biomass. It has already  
57 manufactured in different countries such as France for feed and food purposes [4,5].

58 In context to leaf-based protein, the concept of green biorefineries is not be bypassed. Green  
59 biorefineries are novel technology systems for production of materials and energy processing  
60 using parts or total green plants [6]. Above all, green biorefinery technologies are based on  
61 traditional technologies of green forage preservation, leaf-protein extraction, chlorophyll  
62 production, and modern biotechnological and chemical conversion methods [6,7,8,9]. Sugar beet,  
63 clover, alfalfa and grass are the most common and perspective species for green biorefinery  
64 purposes in continental climate zone. However, several other crops may also be suitable.

65 Jerusalem artichoke can grow normally under harsh conditions [10,11]. It is tolerant to many  
66 biotic and abiotic stresses such as pests and diseases [12], saline and alkaline soils, poor and  
67 sandy soils with nearly zero fertilizer requirements [13], marginal lands [10], drought and high  
68 temperature without interfering with other commercial crops as well [14]. Another important  
69 advantage of Jerusalem artichoke, in comparison with the other fodder crops, is its ability to  
70 produce huge green biomass under low input conditions (about 120 tons ha<sup>-1</sup> fresh weight) [15].  
71 This is an important aspect to avoid competition with the production of food in arable lands [16].  
72 The nutritional value of Jerusalem artichoke is mainly due to the high inulin and fructose content  
73 of sweetish tubers. Tuber, also, contains protein, nutrients and vitamins; therefore, it is valuable  
74 for animal feeding and human consumption [16]. Although the aerial part of Jerusalem artichoke

75 has widely gained the attraction of many researchers for bioethanol production due to its  
76 lignocellulose content [12,17], it can be directed towards other significant uses such as animal  
77 feeding as fresh forage, silage, or food pellets [16]. In addition, there are some information about  
78 green leafy shoot which contain protein (stalk: 1.6%–4.5% DW; leaves 7.1%–24.5% DW),  
79 volatile sesquiterpenes, some phenolic compounds, chlorophylls, carotenoids [11,17,18].  
80 However, direct consumption of fresh or dried Jerusalem artichoke biomass is not preferable  
81 because trichomes covered leaves and stem [11]. Alternatively, green biomass can be fractionated  
82 mechanically to green juice and fiber fractions. The cell wall-deprived green juice can be  
83 thermally treated in order to extract proteins by coagulation. From the aspect of green biorefinery  
84 the separate leaf protein concentrate as main product has special importance hence to become  
85 competitive process it should produce at least one product of high value (such as a high value  
86 chemical or material).

87 In accordance with the above, the present study aimed to provide a detailed insight into the  
88 extraction efficiency and biochemical composition of green biomass originated Jerusalem  
89 artichoke leaf protein concentrate (JAPC). Three clones of Jerusalem artichoke representing  
90 different climatic zones were grown under low input conditions in Hungary. Biochemical  
91 composition and qualitative determination of phytochemicals in JAPC were conducted via Ultra-  
92 High Performance Liquid Chromatography-Electrospray Ionization/Mass Spectrometry  
93 (*UHPLC-ESI-MS*).

## 94 **Materials and Methods**

### 95 **Experimental installation**

96 A field experiment was conducted in 2016 at the Horticultural Demonstration garden of the  
97 University of Debrecen, Hungary (47°33'N; 21°36'E). Three different clones of Jerusalem  
98 artichoke (i.e., Alba, Fuseau and Kalevala) were compared for their fresh aerial biomass yield,  
99 JAPC and phytochemical composition under low input conditions. Tubers of Jerusalem artichoke  
100 clones representing three climatic zones were obtained from different sources as follow: Alba  
101 was brought from Hungarian market; Fuseau was brought from Ismailia, Egypt; and Kalevala  
102 was obtained from Helsinki, Finland. The experiment was set up in a randomized complete block  
103 design with six replicates. The area of the experimental plot was 0.8×0.6 m<sup>2</sup>; the row was 3.5 m  
104 in length and 0.8 m in width within-row spacing 0.6 m. The cultivation of the Jerusalem artichoke  
105 clones started on 5<sup>th</sup> April 2016 using size-identical tubers (60 – 80 g/tuber). No irrigation and  
106 fertilization were applied in the plantation during the growing season. Chemical characteristics of  
107 the experimental soil were: total N (555±2 mg kg<sup>-1</sup>); total P (6793±17 mg kg<sup>-1</sup>); total K (1298±7  
108 mg kg<sup>-1</sup>) and humus (1.9±0.02%).

## 109 **Harvest of aboveground fresh biomass**

110 Considering the re-growing ability of Jerusalem artichoke plants, the green biomass of the three  
111 clones was harvested two times during the growing season when young shoot reached 1.3 - 1.5 m  
112 height from soil surface. The first harvest was carried out on 27<sup>th</sup> June 2016, while the second  
113 harvest was on 8<sup>th</sup> August 2016. Fresh yield of aerial part was measured.

## 114 **Fractionation of harvested green biomass**

115 The harvest of Jerusalem artichoke plants was carried out in the early morning and immediately  
116 transferred to the laboratory in an ice box to inhibit the degradation chemical compounds. Plants  
117 were harvested 20 cm above soil surface. One-kilogram green biomass was mechanically

118 pressed and pulped by a twin-screw juicer (Green Star GS 3000, Anaheim, Canada) to green juice  
119 and fiber fractions in three replicates. Thereafter, the green juice was thermally coagulated at 80  
120 °C to obtain JAPC. The JAPC was separated from brown-colored liquid fractions using cloth  
121 filtration. Both fresh and dry masses of JAPC were weighted. The JAPC was lyophilized using  
122 the Alpha 1-4 LSC Christ lyophilizer.

## 123 **Biochemical composition of JAPC**

### 124 **Crude protein content**

125 Total protein content of JAPC was measured as total N content by Kjeldahl method [19] as  
126 follows: one gram lyophilized sample was weighted in a 250 mL Kjeldahl digestion tube and then  
127 15 mL concentrated sulfuric acid (99%, VWT, Ltd) and 2 catalyst tablets were added. The  
128 Kjeldahl digestion tubes were transferred to Tecator Digester (VELT, VWR Ltd.) at 420°C for  
129 1.5 hour. The total N content in the digested samples was later measured by titration method; and  
130 total N content of the sample was calculated based on the weight of the titration solution and the  
131 sample weight. The total protein content of the sample was calculated as follow: Total protein, %  
132 = total N content × 6.25.

### 133 **Quantification of amino acid composition in JAPC by Amino acid analyzer**

134 For the sample preparation lyophilized and grinded sample of JAPC was digested with 6M HCl  
135 in at 110°C for 23 hours. Since the digested sample should contain at least 25 mg N, therefore the  
136 measured weight of the samples was variable. For removing the air from the samples inert gas  
137 and vacuum alternating with applying a three-way valve were used. After hydrolyzing, the  
138 sample was filtered into evaporator flask. The filtrate was evaporated under 60°C to achieve  
139 syrup-like consistency. Thereafter, distilled water was added to the sample and it was evaporated

140 again using the same circumstances. This procedure was repeated one more time. The evaporated  
141 sample was washed and completed with citrate buffer pH 2.2. For the analysis of amino acid  
142 composition INGOS AAA500 (Ingos Ltd., Czech Republic) Amino Acid Analyzer was used. The  
143 method of separation based on ionic exchange chromatography with postcolumn derivatization of  
144 ninhydrine. UV/VIS detector was used on 440/570 nm.

### 145 **Determination of fatty acid composition in JAPC by Gas Chromatography**

146 Esterification of fatty acids in JAPC fraction into methyl esters was conducted using sodium  
147 methylate catalyst. Seventy milligram of lyophilized homogeneous sample was weighed into a 20  
148 mL tube; 3 mL of n-hexane, 2 mL of dimethyl carbonate and 1 mL of sodium methylate in  
149 methanol were added. The contents of the test tube were shaken for 5 minutes (Janke and Kunkel  
150 WX2) and then 2 mL of distilled water was added and shaken again. The samples were then  
151 centrifuged at 3000 rpm for 2 minutes (Heraeus Sepatech, UK). The 2.0 mL of supernatant  
152 (hexane phase) was transferred into container through a filter paper, which contained anhydrous  
153 sodium sulfate. The prepared solution contained approximately 50-70 mg cm<sup>-3</sup> fatty acid methyl  
154 ester (FAME) was directly suitable for gas chromatography measurement. Gas Chromatography  
155 analysis was performed by Agilent 6890 N coupled with an Agilent flame ionization detector. A  
156 Supelco Omegawax capillary column (30 m, 0.32 mm i.d., 0.25 µm film thickness) was used to  
157 separate FAMES. The oven temperature was 180 °C and total analysis time was 36 min. An  
158 Agilent 7683 automatic split/splitless injector was used with 280 °C injector temperature and  
159 100:1 split ratio. Injection volume was 1µL. The carrier gas was hydrogen with a flow rate of 0.6  
160 ml min<sup>-1</sup> and the makeup gas was nitrogen with a flow rate of 25.0 ml min<sup>-1</sup>. The components  
161 were identified by retention data and standard addition.

### 162 **Screening of phytochemicals in JAPC by UHPLC-ESI-MS**

## 163 **Sample preparation**

164 For the hydro-alcoholic extracts 0.5 g grinded JAPC powder was used and extraction was done  
165 by 25 mL methanol:water solution at ratio of 7:3. The mixture was stirred on 150 rpm for 2h at  
166 room temperature. The hydro-alcoholic extracts were filtered using a 0.22  $\mu\text{m}$  PTFE syringe  
167 filter.

## 168 **UHPLC-ESI-MS analysis**

169 The phytochemical analyses were performed by UHPLC-ESI-MS (Ultra-High Performance  
170 Liquid Chromatography-electrospray ionization/mass spectrometry) technique using a Dionex  
171 Ultimate 3000RS UHPLC system (Thermo Fisher, USA) coupled to a Thermo Q Exactive  
172 Orbitrap hybrid mass spectrometer equipped with a Thermo Accucore C18 analytical column (2.1  
173 mm  $\times$  100 mm, 2.6  $\mu\text{m}$  particle size). The flow rate was maintained at 0.2 mL/min. The column  
174 oven temperature was set to 25°C  $\pm$ 1 °C. The mobile phase consisted of methanol (A) and water  
175 (B) (both were acidified with 0.1% formic acid). The gradient program was as follows: 0 - 3 min,  
176 95 % B; 3 - 43 min, 0 % B; 43 - 61 min, 0% B; 61 - 62 min, 95% B; 62 - 70 min, 95% B. The  
177 injection volume was 2  $\mu\text{L}$ .

## 178 **Mass spectrometry (MS) conditions**

179 Thermo Q Exactive Orbitrap hybrid mass spectrometer (Thermo Fisher, USA) was equipped with  
180 an electrospray ionization (ESI) source. The samples were measured in positive and negative  
181 ionization mode separately. Capillary temperature: 320 °C. Spray voltage: 4.0 kV in  
182 positive ionization mode and 3.8 kV in negative ionization mode, respectively. Resolution:  
183 35,000 in the case of MS1 scans and 17,500 in the case of MS2 scans. 100-1500 m/z  
184 was the scanned mass interval. For MS/MS scans the collision energy was



185 set to 30 NCE. The difference between measured and calculated molecular ion  
186 masses was less than 5 ppm in every case. The data were acquired and processed using Thermo  
187 Trace Finder 2.1 software based on own and internet databases (Metlin, Mass Bank of North  
188 America, m/z Cloud). After processing the results were manually checked using Thermo  
189 Xcalibur 4.0 software. The compounds found in the extracts were identified on the basis our  
190 previous published works or data found in literature using exact molecular mass, isotopic pattern,  
191 characteristic fragment ions and retention time.

## 192 **Quality assurance of results**

193 Glassware and plastic ware for analyses were usually new and were cleaned by soaking in 10%  
194 (v/v) HNO<sub>3</sub> for a minimum of 24 h, followed by thorough rinsing with distilled water. All  
195 chemicals were analytical reagent grade or equivalent analytical purity. All the used equipment  
196 was calibrated and uncertainties were calculated. Internal and external quality assurance systems  
197 were applied in the Central Laboratory of the University of Debrecen according to MSZ EN ISO  
198 5983-1: 2005 (for Total N) and Bunge Private Limited Company Martfü Laboratory MSZ 190  
199 5508: 1992 (for fatty acid composition).

## 200 **Statistical analysis**

201 The experimental design was established as a randomized complete block design with six.  
202 Results of the experiments were subjected to one-way ANOVA by ‘R-Studio’ software and the  
203 means were compared by Duncan’s Multiple Range Test at  $p < 0.05$  [20].

## 204 **Results**

### 205 **Green biomass of Jerusalem artichoke clones**

206 Results of aboveground fresh biomass yield presented in Table 1. It is showed that the yield of  
207 Jerusalem artichoke clones were similar. No significant differences among tested clones (i.e.,  
208 Alba, Fuseau and Kalevala) were noticed especially during the 1<sup>st</sup> harvest. By contrast, the  
209 harvesting time influenced the yield. Significant lower yield could be harvested at the second  
210 harvest time. The average fresh biomass yield was approximately 5.3 kg m<sup>-2</sup> in the 1<sup>st</sup> harvest,  
211 while in the 2<sup>nd</sup> harvest the yield significantly reduced as the average biomass was 2.4 kg m<sup>-2</sup>  
212 (Table 1). The calculated total aboveground fresh biomass yield – as an average – was estimated  
213 to be 7.7 kg m<sup>-2</sup>.

214 **Table 1.** Aboveground fresh biomass, dry mass and total protein content of Jerusalem artichoke  
215 leaf protein concentrate (JAPC) isolated from green biomass of different clones

216

## 217 **JAPC yield**

218 Results of JAPC isolated from 1 kg fresh green biomass of Jerusalem artichoke clones by thermal  
219 coagulation are displayed in Table 1. Statistical analysis showed insignificant differences among  
220 Jerusalem artichoke clones whether in 1<sup>st</sup> or 2<sup>nd</sup> harvests. The JAPC yield ranged from 28.3  
221 (Fuseau) to 32.3 (Kalevala) g kg<sup>-1</sup> fresh biomass in the 1<sup>st</sup> harvest, while in the 2<sup>nd</sup> harvest JAPC  
222 yield varied from 28 (Kalevala) to 30.4 (Alba) g kg<sup>-1</sup> fresh biomass (Table 1). However, results  
223 showed that the average JAPC dry yield of the 1<sup>st</sup> and 2<sup>nd</sup> harvests were 30.8 and 29.1 g kg<sup>-1</sup> fresh  
224 biomass, respectively. Therefore, it could be calculated that 1 kg of green biomass of Jerusalem  
225 artichoke gives approximately 30 g JAPC dry mass as an annual average.

## 226 **Total protein content of JAPC**

227 The total protein content (m/m%) of JAPC generated from fresh green biomass of Jerusalem  
228 artichoke clones ranged between 33.3 m/m% (Fuseau) and 35.3 m/m% (Alba) in the 1<sup>st</sup> harvest,  
229 while in the 2<sup>nd</sup> harvest it varied from 31.6 m/m% (Alba) to 35.2 m/m% (Fuseau). Statistically,  
230 no significant differences were calculated either between clones or between harvests (Table 1).  
231 The average total protein content in the 1<sup>st</sup> harvest was 34.1 m/m% and in the 2<sup>nd</sup> harvest was  
232 33.4 m/m%. The annual average of total protein content of JAPC extracted from Jerusalem  
233 artichoke fresh biomass is estimated to be 33.8 m/m% (Table 1).

## 234 **Quantitative analysis of amino acid composition of JAPC**

235 The results of amino acid composition of JAPC obtained from green biomass of Jerusalem  
236 artichoke clones are presented in (Table 2). The essential amino acids (i.e., lysine, histidine,  
237 isoleucine, leucine, phenylalanine, methionine, threonine and valine) play a major role in feeding;  
238 therefore, they receive a special interest. Among the examined Jerusalem artichoke clones,  
239 Kalevala possessed the highest values of 5 out of the 8 essential amino acids (i.e., phenylalanine,  
240 histidine, isoleucine, threonine and valine). Also, aspartic acid, glycine, glutamic acid, proline  
241 and serine had the highest values 4.23, 2.13, 4.82, 2.20 and 1.90 m/m%, respectively, in JAPC of  
242 Kalevala (Table 2). The concentration of lysine as essential amino acid has special importance in  
243 animal feeding. We found that the lysine content of Alba, Fuseau and Kalevala (ranged between  
244 2.19 to 2.32 m/m%, in the first harvest. The tendency of change in lysine content was similar but  
245 with higher values in the second harvest considering the Alba, Fuseau, Kalevala as their content  
246 varied from 2.35 to 2.54 m/m%. The methionine is another limiting amino acid. The methionine  
247 content of Alba and Fuseau clones changed between 0.82 to 0.95 m/m% in both harvests (Table  
248 2). Results, also, showed that lysine content increased in the 2<sup>nd</sup> harvest compared to 1<sup>st</sup> harvest

249 for all clones; while, a reduction in methionine content was found in the 2<sup>nd</sup> harvest compared to  
250 1<sup>st</sup> harvest for all clones except Fuseau.

251 **Table 2.** Amino acid profile (%) of Jerusalem artichoke leaf protein concentrate (JAPC)  
252 extracted from green biomass of different clones

253

## 254 **Quantitative analysis of fatty acid composition of JAPC**

255 Both saturated (SFA) and unsaturated fatty acids (UFA) could be detected from originated JAPC.  
256 Polyunsaturated fatty acids (PUFA) including linoleic acid (C18:2 $\omega$ -6), linolenic acid (C18:3 $\omega$ -3)  
257 -3) and arachidonic acid (C20:4 $\omega$ -6) were the predominant fatty acids (66 - 68%) in all  
258 Jerusalem artichoke clones (Figs 1 and 2). Among them linolenic acid (38.6 – 42.7%) exhibits a  
259 narrow range of distribution with highest values regardless of clones or harvesting time. The  
260 Linoleic acid (C18:2 $\omega$ -6) had the second highest concentration with min. 23.4 % in 1<sup>st</sup> harvest  
261 JAPC of Kalevala and with max. 26.9 % in 2<sup>nd</sup> harvest JAPC of Alba. All analyzed JAPC had the  
262 lowest proportion of arachidonic acid (C20:4 $\omega$ -6) at 0.3 – 0.6% of total fatty acids (Fig1).  
263 Among monosaturated fatty acid (MUFA) the oleic acid (C18:1 $\omega$ -9) could be detected with  
264 higher values (6.6 – 11.6%). The proportion of palmioletic acid (C16:1 $\omega$ -7) was significant  
265 lower, changed in the range of 0.7 – 1.1% (Fig 3). From saturated fatty acids (SFA) myristic acid  
266 (C14:0), palmitic acid (C16:0) and stearic acid (C18:0) could be separated. Palmitic acid (C16:0)  
267 was is the most abundant saturated component with no significant differences (16.4 – 17.9%)  
268 considering the clones and harvesting time. The percentage composition of myristic acid (2.5 –  
269 6.9%) and stearic acid (1.5 – 1.8%) in JAPC fractions were markedly lower compare to palmitic  
270 acid (Fig 1).

271 **Fig 1.** Fatty acid composition (%) of Jerusalem artichoke leaf protein concentrate (JAPC)  
272 extracted from green biomass of different clones (Alba, Fuseau and Kalevala).

273 **Fig 2.** Distribution of saturated fatty acids (SFA), monounsaturated fatty acids (MUFA) and  
274 polyunsaturated fatty acids (PUFA) in Jerusalem artichoke leaf protein concentrate  
275 (JAPC) extracted from green biomass of different clones (Alba, Fuseau and Kalevala).

276  
277 Reverse tendency of oleic acid and myristic acid content could be found considering the first and  
278 second harvest. Myristic acid content was higher in the 1<sup>st</sup> harvest of JAPC of all three Jerusalem  
279 artichoke clones. While the oleic acid content was higher in the 2<sup>nd</sup> harvest of JAPC of Alba and  
280 Kalevala clones (Fig1).

## 281 **Screening of phytochemicals of JAPC by UHPLC-ESI-MS**

282 The identification of compounds was primarily based on the correspondence of the ion from the  
283 deprotonated or protonated molecule using scientific literature results and fragmentation patterns  
284 of similar compounds. Profiles of phytochemicals of JAPCs isolated from different Jerusalem  
285 artichoke clones (i.e., Alba, Fuseau and Kalevala) showed negligible differences. Up to 61  
286 phytochemicals were defined based on specific retention time, accurate mass, isotopic  
287 distribution and fragmentation pattern, and by screening MS databases like Metlin, mzCloud and  
288 Massbank (Table 3). Table 3 showed that the phenolic compounds were significant part of the  
289 identified compounds. Regardless of Jerusalem artichoke clones, all three caffeoyl quinic acid  
290 isomers could be identified in the JAPCs with a characteristic  $[M-H]^-$  ion at  $m/z$  353.0873  
291 measured by LC-ESI-MS technique in present experiment. In accordance with Yuan et al. [21] 3-  
292 O-Caffeoylquinic acid was in highest ratio, while neochlorogenic and chrysochlorogenic acids  
293 were in fewer amounts (Fig 3). Along with it, we could identified three di-O-caffeoylquinic acid  
294 isomers exhibited  $[M-H]^-$  ion at  $m/z$  515.1190, four Coumaroylquinic acid isomers  $[M-H]^-$  ion

295 at m/z 337.0924 and a 5-O-Feruloylquinic acid  $[M-H]^-$  ion at m/z 367.1029 from hydro-  
296 alcoholic JAPC extracts. The measurement also revealed the existence of a compound with a  
297  $[M-H]^-$  ion at m/z 299.0767 in all JAPC extracts. The ion scan experiment of this ion showed the  
298 corresponding fragment ions at m/z 137.0233; 113.0229; 93.0331; 85.0281 and 71.0122. After  
299 comparison with database this compound was identified as salicylic acid-O-glucoside.

300 **Table 3.** Chemical composition of Jerusalem artichoke leaf protein concentrate (JAPC) extracted  
301 from green biomass

302 **Fig 3.** Extracted Ion Chromatograms (XIC) and MS spectra of selected phytoconstituents from  
303 Jerusalem artichoke leaf protein concentrate: A: quercetin- 3-O-glucuronide; B:  
304 Scopoletin; C: Loliolide; D: Liquiritigenin

305  
306 Among flavonoids quercetin-O-glucoside with m/z 463.0877, isorhamnetin-3-O-glucoside with  
307 m/z 477.1033, kaempferol glucuronide with m/z 461.0720 and kaempferol-3-O-glucoside with  
308 m/z 447.0927 were found in all studied JAPC in agreement with Jerusalem artichoke related  
309 literature [18,22]. However, according to our knowledge this is the first time to identify  
310 glucuronide derivatives of isorhamnetin and quercetin (Table 3 and Figs 3 and 4). In addition to  
311 flavonols, most of the identified flavonoids are belonged to flavones. None of them have been  
312 described yet from *Helianthus tuberosus* according to our knowledge. All of identified flavones  
313 contained one or more methoxy groups besides hydroxyl groups. For instance we could identified  
314 two dimethoxy-trihydroxyflavone isomers exhibited  $[M-H]^-$  ion at m/z 329.0661; dimethoxy-  
315 tetrahydroxyflavone  $[M-H]^-$  ion at m/z 345.0611; dihydroxy-methoxyflavone  $[M-H]^-$  ion at m/z  
316 283.0607, trihydroxy-trimethoxyflavone  $[M-H]^-$  at m/z 359.0767. Hymenoxin (5,7-Dihydroxy-  
317 3',4',6,8-tetramethoxyflavone) at m/z 375.1080 and Nevadensin (5,7-Dihydroxy-4',6,8-  
318 trimethoxyflavone) at m/z 317.1389; however, could be identified in positive ESI mode (Table 2

319 and Fig 2). Liquiritigenin (4',7-Dihydroxyflavanone)  $[M-H]^-$  at  $m/z$  255.0657 was the only  
320 flavanone found in all studied JAPC of Jerusalem artichoke clones.

321 Besides polyphenols three different terpenes were consistently appeared in all studied JAPC of  
322 Jerusalem artichoke clones. Loliolide as  $C_{11}$  monoterpenoid lactone was one of them exhibited  
323  $[M+H]^+$  ion at  $m/z$  197.1178. As well as dihydroactinidiolide as a volatile monoterpene  $[M+H]^+$   
324 ion at  $m/z$  181.1229 and 7-Deoxyloganic acid isomer as iridoid monoterpene  $[M-H]^-$  ion at  $m/z$   
325 359.1342 were defined. Several proteinogen aminoacids (Table 3) could be identified. Among  
326 vitamins we were able to identify some vitamin B such as nicotinic acid (niacin)  $[M+H]^+$  ion at  
327  $m/z$  124.0399 and riboflavin  $[M+H]^+$  ion at  $m/z$  377.1461. In addition, organic acids (i.e., malic  
328 acid and citric acid) and plant hormones (i.e., indole acetic acid) could also be identified in  
329 Jerusalem artichoke JAPC.

330 **Fig 4.** Extracted Ion Chromatoram of chlorogenic acid isomers

331

## 332 **Discussion**

333 Increasing the global demand for protein and with limited soy cultivation along with reliance on  
334 many countries in imports; all make the search for alternatives a necessity. Hence, recently the  
335 interest in green biomass has been gained a wide attraction, as it may represent a relevant  
336 substitute of seed-based proteins. Jerusalem artichoke proved its ability to grow on a wide range  
337 of soils with low inputs requirement. Moreover, it is tolerant to many biotic and abiotic stresses  
338 such as insects, drought, heat and salinity [17]. For instance, in the harsh environments, it yields  
339 around 30 Mg ha<sup>-1</sup> DM forage (aerial part) with 15.3% of crude protein [17]. These qualities  
340 make Jerusalem artichoke a suitable candidate for a sustainable JAPC production with no  
341 competition with the recognized fodder crops. Therefore, three Jerusalem artichoke clones

342 representing three different climatic zones, such as humid continental (Hungary), arctic (Finland)  
343 and hot desert climate (Egypt), were assessed for their JAPC production from a rain-fed  
344 plantation with zero fertilizers.

345 Chloroplastic and cytoplasmic proteins of plant cells are the main source for JAPC production,  
346 and they found at higher concentration in leaf tissues than in stem [23]. Young stems and leaves  
347 of Jerusalem artichoke are succulent and turn to be woody with the time [15] therefore, in the  
348 present study we harvested the aerial part two times during the growing season when reached 1.3  
349 - 1.5 m height, respectively. The fresh biomass aerial part of Jerusalem artichoke clones in  
350 average was 5.3 kg m<sup>-2</sup> in the first harvest and reduced to 2.4 kg m<sup>-2</sup> in the 2<sup>nd</sup> harvest. However,  
351 the total measured fresh biomass of the aboveground part was 7.7 kg m<sup>-2</sup>; no significant  
352 differences among studied clones were reported. Non-native varieties (Fuseau and Kalevala)  
353 displayed high green biomass productivity under Hungarian climate. With average moisture  
354 content of 47.8%, it was calculated that total dry shoot biomass was 3.7 kg m<sup>-2</sup> which is  
355 equivalent to 36.8 Mg ha<sup>-1</sup>. This total dry biomass of aerial part was higher than this cited by  
356 [23], who reported 25 Mg ha<sup>-1</sup>. It is important to be cognizant of the fact that this green biomass  
357 was yielded from rain-fed plantation of Jerusalem artichoke; therefore, Jerusalem artichoke is  
358 expected to produce higher aerial biomass yield since its shoot part is more sensitive to water  
359 stress than tuber. According to [24] the irrigated plots of Jerusalem artichoke had higher  
360 aboveground biomass by 98% than unirrigated plots.

361 Using aerial part of Jerusalem artichoke for animal feeding as fresh fodder or processed either in  
362 the form of silage or feed formulations has long been known. However, this could be restricted  
363 by trichomes which cover the surface of leaves and stem, as well as decreased protein and  
364 increased lignin contents when plants become older [15,25]. Hence, processing extracts the



365 protein from shoot part in the form of JAPC is vital for increasing the economic value of  
366 Jerusalem artichoke. Another reason for the importance of JAPC production is that fresh stem is  
367 lower quality for feeding plants since it contains higher carbohydrate content and lower protein  
368 content than leaves [26]. Pressing and pulping of collected fresh green biomass resulted in, as an  
369 average, 10.2% fresh mass of JAPC. These results emphasize that Jerusalem artichoke has the  
370 qualities of what makes it suitable candidate for JAPC production.

371 Average total protein content of JAPC generated from Alba, Fuseau and Kalevala clones was  
372 33.4 m/m%. However, most of isolated protein is referred to leaves as Jerusalem artichoke leaves  
373 contain three times higher total protein than stem [27]; our results were in agreement with these  
374 findings. Total protein content of JAPC extracted mainly from leaves most of which is made up  
375 of assimilation parenchyma tissue (80- 87%) with easily released cytoplasmic and chloroplast  
376 proteins. Rubisco has the greatest significance among leaf soluble protein with its high nutritional  
377 value [28]. Harvesting time of aerial part is critical from the aspects of quantity and quality of  
378 JAPC production. Rashchenko [29] reported that nitrogen content in older leaves decreased by  
379 approximately 50% compared to young leaves. Seiler [30], also, reported that total protein  
380 reduced by 32.6% from vegetative to flowering stage of Jerusalem artichoke plants. Knowing  
381 this, the shoots were harvested in the maximum green leaf state (1.3 – 1.5 m) ahead of senescence  
382 and avoiding the dryness of bottom leaves. Following this thread, the results showed no big  
383 difference in protein content between the two harvests.

384 When it comes to the ideal protein source, the amino acid profile cannot be ignored because  
385 among the 20 proteinogenic amino acids nine cannot be synthesized by most animal species [31].  
386 The ratio of these essential amino acids has special interest. Among green biomass originated  
387 fractions, JAPC as dedicated protein enriched product for feed was examined more thoroughly.

388 Several indispensable amino acids i.e., lysine, isoleucine, leucine, methionine and threonine  
389 showed high content in JAPC. However, higher contents of amino acids in JAPC were reported  
390 by [23]; this could be attributed to the different extraction method and different varieties. The  
391 results of amino acids exhibited minor measured differences between the two harvests; this could  
392 be due to the different weather and plant age as has been previously documented [15,29,30].

393 Several literatures discussed the fatty acid and lipid content in tubers of Jerusalem artichoke  
394 [15,32]; however, meager information about fatty acid composition in leaves is available in  
395 scientific studies. Nowadays, there is a growing attention in polyunsaturated fatty acids (PUFA)  
396 because humans and other mammals are incapable to synthesize omega-6 and omega-3 PUFA in  
397 the lack of delta ( $\Delta$ ) 12 and  $\Delta$ 15 desaturase enzymes. These enzymes are responsible to insert cis  
398 double bond at the n-6 or n-3 positions [5]. Hence, linolenic acid (C18: 3 $\omega$  -3) and linoleic acid  
399 (C18:2 $\omega$  -6) are essential nutrients convert from oleic acid in the endoplasmic reticulum (ER) of  
400 plant cells. Linolenic acid is the precursor of longer-chain PUFA such as eicosapentaenoic acid  
401 (EPA: C20:5 $\omega$  -3) and docosahexaenoic acid (DHA: C22:6 $\omega$  -3) which can be synthesized in  
402 human. Similarly linoleic acid (C18:2 $\omega$  -6) is also essential precursor to synthesize dihomo-  $\gamma$ -  
403 linoleic acid (DGLA: C20:3 $\omega$  -6) and arachidonic acid (AA: C20:4 $\omega$  -6). Because of their  
404 essentiality, linolenic acid and linoleic acid need to be supplied with a diet of animals or humans.  
405 Regardless of observed clones the highest contribution to the fatty acid profile were noted for  
406 linolenic acid (C18: 3 $\omega$  -3) with 38.6 – 42.7% values and linoleic acid (C18:2 $\omega$  -6) with 23.4 –  
407 26.9 % in JAPCs (Fig 1). Along with anthropological and epidemiological studies right  
408 proportion of linoleic acid and linolenic acid should be emphasized. The ratio of omega-6 to  
409 omega-3 essential fatty acids evolved ~1: 1 in the evolutionary history of human diet In contrast,  
410 following the current Western diet the ratio has shifted to 10-20:1 which is not desirable from

411 health aspect and promotes the pathogenesis of many diseases [33]. We found ~0.6: 1 ratio of  
412 omega-6 to omega-3 essential fatty acids in JAPC which is very favorable, close to the  
413 Paleolithic nutrition.

414 Arachidonic acid as a PUFA could also be measured from JAPC even at low proportion (0.3 –  
415 0.6%) in agreement with Shanab et al. [34] who found little amounts of AA are in terrestrial  
416 plants. Arachidonic acid mainly could be identified in many algal groups, which grow  
417 photoautotrophically or heterotrophically. Among marine macroalgae AA can reach 60% of total  
418 FAs content in case of *Gracilaria* sp. red alga.

419 The saturated palmitic acid (C16:0), stearic acid (C18:0) and the monosaturated form of stearic  
420 acid the oleic acid (C18:1 $\omega$ -9) are often referred to as common fatty acids. They biosynthesis  
421 occurs in plastids and partially incorporated into cell and subcellular membranes [35]. The JAPC  
422 originated mainly from crushed cells of vegetative tissues containing membrane debris. This  
423 explains the relative higher proportion of palmitic acid (16.4 – 17.9%) and oleic acid (6.6 –  
424 11.6%). Considering the harvesting time, oleic acid content of Alba and Kalevala JAPC showed  
425 higher value in the 2<sup>nd</sup> harvest (when the nights were colder). According to Barrero-Sicilia et al.  
426 [36] plants often respond to low temperature by increasing unsaturated fatty acids in membrane  
427 along with increased membrane fluidity and stabilization. We found reverse tendency in saturated  
428 myristic acid (C14:0) content of JAPC. It showed higher values in the 1<sup>st</sup> harvest (when the nights  
429 were warmer) in case of all three Jerusalem artichoke clones.

430 The phytochemical screening by UHPLC ESI MS was performed in both negative and positive  
431 ESI modes owing to the varying ionization requirements of compounds. Negative mode was used  
432 for identification of flavonoid and phenolic acid (hydroxycinnamic acid and benzoic acid)  
433 derivatives which provided better sensitivity. The easy protonation of nitrogen in positive mode

434 made it suitable for identification of terpenes, amino acids and coumarins, coumarylquinic acids.  
435 Within non-flavonoid phenolic constituents, the caffeoyl quinic acid as also called chlorogenic  
436 acid isomers are important subgroup and their presence is characteristic of Asteraceae family.  
437 According to some literature the chlorogenic acid (3-O-Caffeoylquinic acid) is the most abundant  
438 isomer in plant sources, while the cryptochlorogenic acid (4-O-Caffeoylquinic acid) and  
439 neochlorogenic acid (5-O-Caffeoylquinic acid) are in low concentrations [37]. Yuan et al. [21]  
440 found 3-O-Caffeoylquinic acid and 1,5-dicaffeoyl quinic acid in the highest concentration in  
441 Jerusalem artichoke extracted leaves. However, Liang and Kitts [38] reported that generally the  
442 5-O-Caffeoylquinic acid is the predominant isomer in fruits and vegetables. The presence of  
443 these phenolic acids is interesting from both human and animal aspects because of several  
444 biological roles are attributed to caffeoyl quinic acid isomers in such as antioxidant activity,  
445 antibacterial, hepatoprotective, cardioprotective, anti-inflammatory, antipyretic, neuroprotective,  
446 anti-obesity, antiviral, anti-hypertension, and a central nervous system stimulator. In addition,  
447 they can be confirmed to modulate lipid metabolism and glucose in both genetically and healthy  
448 metabolic related disorders [21,39]. Based on the health promoting effects, caffeoyl quinic acid  
449 isomers are increasingly recommended as natural and safe food additive supplement instead of  
450 synthetic antibiotics and immune boosters.

451 The presence of coumarins as non-flavonoid polyphenols has also been revealed from JAPC  
452 fractions of Jerusalem artichoke. Scopoletin, isoscopoletin, were identified with a characteristic  
453  $[M+H]^+$  ion at  $m/z$  193,05, in addition 6-methylcoumarin and fraxidin were also found in  
454 assessable quantities.

455 Flavonoids are widespread secondary metabolites within phenolic constituents in plant kingdom.  
456 However, few of them were described in Jerusalem artichoke such as isorhamnetin glucoside,

457 kaempferol glucuronide and kaempferol-3-o-glucoside from leaves [18]. In present study, 18  
458 flavonoids were recognized in JAPC (Table 3). Generally, cell vacuoles are the main storage of  
459 soluble flavonoids. Primarily, the solubility of flavonoids is due to the different sugar  
460 substitution. Because of JAPC is coagulated pressed green juice - which mainly contain the  
461 cytoplasm included vacuoles - this could be one of the reasons of the relatively more flavonoids  
462 found in the present study. Among sugars glucose and glucuronic acid at a single position is  
463 probably the most common substituents [40]. In screened JAPC, glycosylated flavonoids were  
464 occurred. The importance of flavonoid glucuronides is related to health-promoting activities such  
465 as anti-inflammatory and neuroprotective activities of quercetin-3-*O*-glucuronide [41].  
466 Most of identified flavonoid compounds by UHPLC-ESI-MS technique belonged to the flavones.  
467 All of identified flavones were hydroxylated methoxyflavone which mean one or more methoxy  
468 groups on flavone basic framework besides/instead of hydroxyl groups. Substitution of a  
469 methoxy group for the hydroxyl group in flavones has significant importance. One side the  
470 hydroxyl groups flavones have free radical scavenging activity, but extensive conjugation of free  
471 hydroxyl groups to flavones results in low oral bioavailability hence they undergo rapid sulfation  
472 and glucuronidation in the small intestine and liver by phase II enzymes; consequently,  
473 conjugated metabolites can be found in plasma not the original compounds [42]. However, if one  
474 or more hydroxyl groups are capped by methylation, the substitution of a methoxy group by the  
475 hydroxyl group induces an increase in metabolic stability, improves transport and absorption.  
476 Considering the biological properties and chemical characteristics of hydroxyl and methoxy  
477 groups together, the hydroxylated methoxyflavones combine many advantages of both functional  
478 groups, improving their potential for application in human health [42]. Therefore, the several  
479 hydroxylated methoxyflavones such as dimethoxy-trihydroxyflavone isomers; dimethoxy-  
480 tetrahydroxyflavone; dihydroxy-methoxyflavone, trihydroxy-trimethoxyflavone, hymenoxin and

481 nevadensin increase the value of JAPC. liquiritigenin (4',7-Dihydroxyflavanone) which has been  
482 previously identified by Johansson et al. [17] in flower of *Helianthus tuberosus* was found in our  
483 JAPC. The liquiritigenin is known as promising active estrogenic compound, it is highly selective  
484 estrogen receptor  $\beta$  agonist. It might be helpful to women who suffer from the menopause  
485 symptoms [43].

486 Three different terpenes were consistently appeared in all tested JAPCs of Jerusalem artichoke  
487 clones. Loliolide as C<sub>11</sub> monoterpenoid lactone is considered as a photo-oxidative or thermal  
488 degraded product of carotenoids [44]. Similarly, we could identify dihydroactinidiolide as a  
489 volatile monoterpenoid. It is a flavor component in several plants, such as tobacco and tea.  
490 According to Yun et al. [45] thermal treatment induce the formation of dihydroactinidiolide from  
491  $\beta$ -carotene. Kaszás et al. [11] confirmed that the green juice contains markedly amount of  
492 carotenoids which probably can partially convert to loliolide or dihydroactinidiolide as reason of  
493 detected terpenes. Role of loliolide is confirmed by some scientific studies. According to these  
494 studies, growth and germination inhibition, as well as phytotoxic activities were demonstrated in  
495 plants, in addition to repellent effect against ants and antitumor, antimicrobial activities for  
496 animals and microorganisms [44,46]. Dihydroactinidiolide has carbonyl group that can react with  
497 nucleophilic structures in macromolecules, providing high potential reactivity to the molecules. It  
498 is also showed cytotoxic effects against cancer cell lines Yun et al. [45]. The 7-Deoxyloganic  
499 acid isomer was the other terpene, which is known, as intermediate in secoiridoid pathway in  
500 plants.

501 In summary, the current study delivered deeper insights into JAPC evaluation originating from  
502 fractionated green biomass of different Jerusalem artichoke clones. However future studies on

503 anti-nutritional ingredients of JAPC as well as chemical composition of other fractions such as  
504 brown juice and fiber along with economically calculation are needed to be address.

## 505 **Conclusion**

506 Considering the high amount of lingo-cellulose shoot biomass and inulin enriched tubers several  
507 literatures suggest the utilization of Jerusalem artichoke in biorefinery context. Less information  
508 is available about the green biomass utilization for green biorefinery purposes even Jerusalem  
509 artichoke has repeatedly harvestable leafy shoot with valuable biochemical compounds. At least  
510 one value-added product is necessary to produce in order to achieve cost-effective green bio-  
511 refinery. Hence in the present research paper, we tried to highlight and deliver more information  
512 about leaf protein concentrate (JAPC) generated from different Jerusalem artichoke clones using  
513 biotechnological method. It can be harvested two times a year generating valuable quantities of  
514 green aerial biomass under low inputs condition. Yield of JAPC was almost the same among  
515 studied Jerusalem artichoke clones. Amino acids and fatty acid compositions, as value indicator  
516 parameters, were similar in JAPC generated from Jerusalem artichoke clones. Present  
517 biochemical analysis revealed that the JAPC is not only a good source of protein with favorable  
518 amino acid composition but also it is repository of essential fatty acids, flavonoid and non-  
519 flavonoid phytonutrients. We found that the quantity and/or quality of phytochemicals are  
520 specific primarily for the Jerusalem artichoke species and for the technological way. Within the  
521 species, slight difference can be revealed in the examined parameters between the clones. Results  
522 of present work confirm that this underestimated plant can be directed not only towards tuber  
523 production for inulin extraction, but the green biomass can also represent a value for JAPC  
524 production under low inputs in green biorefineries.

## 525 **Acknowledgment**

526 The authors thank Prof. Mohamed E. Ragab (Horticulture Department, Faculty of Agriculture,  
527 Ain Shams University, Egypt) for providing them with tubers of Fuseau.

## 528 **References**

- 529 1- Henchion M, Hayes M, Mullen AM, Fenelon M, Tiwari B. Future protein supply and demand:  
530 strategies and factors influencing a sustainable equilibrium. *Foods*. 2017; 6(7):53.
- 531 2- Pojić M, Mišan A, Tiwari B. Eco-innovative technologies for extraction of proteins for human  
532 consumption from renewable protein sources of plant origin. *Trends in Food Science &*  
533 *Technology*. 2018; 75:93–104.
- 534 3- Chardigny J-M, Walrand S. Plant protein for food: opportunities and bottlenecks. *OCL*. 2016;  
535 23(4) D404.
- 536 4- European Food Safety Authority, EFSA. Scientific Opinion of the Panel on Dietetic Products  
537 Nutrition and Allergies on a request from the European Commission on the safety of  
538 ‘Alfalfa protein concentrate’ as food. *EFSA* 2009; J 997:1-19.
- 539 5- Grela ER, Pietrzak K. Production technology, chemical composition and use of alfalfa protein  
540 xanthophyll concentrate as dietary supplement. *Journal of Food Processing &*  
541 *Technology*. 2014; 5:10. DOI:10.4172/2157-7110.1000373
- 542 6- Kamm B, Schoenicke P, Hille C. Green biorefinery–industrial implementation. *Food Chem.*  
543 2016; 197:1341–1345.



- 544 7- Solati Z, Jørgensen U, Eriksen J, Søgaard K. Dry matter yield, chemical composition and  
545 estimated extractable protein of legume and grass species during the spring growth. *J. Sci.*  
546 *Food Agric.* 2017; 97(12):3958–3966.
- 547 8- Tamayo-Tenorio A, Schreuders FKG, Zisopoulos FK, Boom RM, van der Goot AJ. Processing  
548 concepts for the use of green leaves as raw materials for the food industry. *Journal of*  
549 *Cleaner Production.* 2017; 64:736-748.
- 550 9- Santamaría-Fernández M, Molinuevo-Salces B, Kiel P, Steinfeldt S, Uellendahl H, Lübeck M.  
551 Lactic acid fermentation for refining proteins from green crops and obtaining a high  
552 quality feed product for monogastric animals. *Journal of Cleaner Production.* 2017;  
553 162:875-881.
- 554 10- Fang YR, Liua JA, Steinberger Y, Xie GH. Energy use efficiency and economic feasibility of  
555 Jerusalem artichoke production on arid and coastal saline lands *Industrial Crops &*  
556 *Products.* 2018; 117:131–139.
- 557 11- Kaszás L, Kovács Z, Nagy É, Elhawat N, Abdalla N, Domokos-Szabolcsy É. Jerusalem  
558 artichoke (*Helianthus Tuberosus* L.) as a potential chlorophyll source for humans and  
559 animals nutrition. *Environmental, Biodiversity and Soil Security.* 2018; 2:1–9.
- 560 12- Gunnarsson IB, Svensson S-E, Johansson E, Karakashev D, Angelidaki I. Potential of  
561 Jerusalem artichoke (*Helianthus tuberosus* L.) as abiorefinery crop. *Industrial Crops and*  
562 *Products.* 2014; 56:231–240.
- 563 13- Razmkhah M, Rezaei J, Fazaeli H. Use of Jerusalem artichoke tops silage to replace corn  
564 silage in sheep diet. *Animal Feed Science and Technology.* 2017; 228:168-177.

- 565 14- Niu L, Manxia C, Xiumei G, Xiaohua L, Hongbo S, Zhaopu L, et al. Carbon sequestration  
566 and Jerusalem artichoke biomass under nitrogen applications in coastal saline zone in the  
567 northern region of Jiangsu. China. *Sci Total Environ.* 2016; 568:885-890.
- 568 15- Kays SJ, Nottingham SF. Biology and chemistry of Jerusalem artichoke: *Helianthus*  
569 *tuberosus* L. CRC Press, Taylor & Francis Group, New York, USA. 2008.
- 570 16- Long XH, Shao HB, Liu L, Liu LP, Liu ZP. Jerusalem artichoke: A sustainable biomass feed  
571 stock for biorefinery. *Renewable and Sustainable Energy Reviews.* 2016; 54:1382–1388.
- 572 17- Johansson E, Prade T, Angelidaki I, Svensson S-E, Newson WR, Gunnarsson IB, et al.  
573 Economically viable components from Jerusalem artichoke (*Helianthus tuberosus* L.) in a  
574 biorefinery concept. *Int. J. Mol. Sci.* 2015; 16(4):8997-9016.
- 575 18- Chen F, Long X, Liu Z, Shao H, Liu L. Analysis of phenolic acids of Jerusalem artichoke  
576 (*Helianthus tuberosus* L.) responding to salt-stress by Liquid Chromatography/Tandem  
577 Mass Spectrometry. *The Scientific World J.* 2014; 568043.
- 578 19- Sparks DL, Page AL, Helmke PA, Loppert RH, Soltanpour PN, Tabatabai MA, et al.  
579 Methods of soil analysis: Chemical methods, Part 3. ASA and SSSA, Madison, WI. 1996.
- 580 20- Duncan DB. Multiple range and multiple F-tests. *Biometric* 1955; 11:1–42.
- 581 21- Yuan X, Gao M, Xiao H, Tan C, Du Y. Free radical scavenging activities and bioactive  
582 substances of Jerusalem artichoke (*Helianthus tuberosus* L.) leaves. *Food Chemistry.*  
583 2012; 133:10–14.
- 584 22- Chae SW, Lee SH, Kang SS, Lee HJ. Flavone glucosides from the leaves of *Helianthus*  
585 *tuberosus*. *Natural Product Sci.* 2002; 8(4):141-143.

- 586 23- Rawate PD, Hill RM. Extraction of a high-protein isolate from Jerusalem artichoke  
587 (*Helianthus tuberosus*) tops and evaluation of its nutrition potential. J. Agric. Food Chem.  
588 1985; 33:29-31.
- 589 24- Mecella G, Scandella P, Neri U, Di Blasi N, Moretti R, Troisi A, et al. The productive and  
590 chemical evolution of the Jerusalem artichoke (*Helianthus tuberosus* L.) under various  
591 conditions of irrigation. Agric. Med. 1996; 126:233–239.
- 592 25- Boswell VR, Steinbauer CE, Babb MF, Burlison WL, Alderman WH, Schoth HA. Studies of  
593 the culture and certain varieties of the Jerusalem artichoke, USDA Technical Bulletin  
594 415, U.S. Department of Agriculture, Washington, DC. 1936.
- 595 26- Hay RKM, Offer NW. *Helianthus tuberosus* as an alternative forage crop for cool maritime  
596 regions: a preliminary study of the yield and nutritional quality of shoot tissues from  
597 perennial stands. J. Sci. Food Agric. 1992; 60:213–221.
- 598 27- Malmberg A, Theander O. Differences in chemical composition of leaves and stem in  
599 Jerusalem artichoke and changes in low-molecular sugar and fructan content with time of  
600 harvest. Swed. J. Agric. Res. 1986; 16:7–12.
- 601 28- Lamsal BP, Koegel RG, Gunasekaran S. Some physicochemical and functional properties of  
602 alfalfa soluble leaf proteins. LWT. 2007; 40:1520–1526.
- 603 29- Rashchenko IN. Biochemical investigations of the aerial parts of Jerusalem artichoke, Trudy  
604 Kazakh. Sel'skokhoz. Inst. 1959; 6:40–52.
- 605 30- Seiler GJ. Nitrogen and mineral content of selected wild and cultivated genotypes of  
606 Jerusalem artichoke, Agron. J. 1988; 80:681–687.

- 607 31- Boisen S, Hvelplund T, Weisbjerg MR. Ideal amino acid profiles as a basis for feed protein  
608 evaluation. *Livestock Production Sci.* 2000; 64:239–251.
- 609 32- Chernenko TV, Glushenkova AI, Rakhimov DA. Lipids of *Helianthus tuberosus* tubers.  
610 *Chemistry of Natural Compounds.* 2008; 44(1):1-2.
- 611 33- Simopoulos AP. Evolutionary aspects of diet, the omega-6/omega-3 ratio and genetic  
612 variation: nutritional implications for chronic diseases *Biomedicine & Pharmacotherapy.*  
613 2006; 60:502–507.
- 614 34- Shanab SMM, Hafez RM, Fouad AS. A review on algae and plants as potential source of  
615 arachidonic acid *J. Adv. Res.* 2018; 11:3–13.
- 616 35- Sadali NM, Sowden RG, Ling Q, Jarvis RP. Differentiation of chromoplasts and other  
617 plastids in plants. *Plant Cell Reports.* 2019; 38:803–818.
- 618 36- Barrero-Sicilia C, Silvestre S, Haslam RP, Michaelson LV. Lipid remodelling: Unravelling  
619 the response to cold stress in *Arabidopsis* and its extremophile relative *Eutrema*  
620 *salsugineum*. *Plant Sci.* 2017; 263:194-200.
- 621 37- Naveed M, Hejazi V, Abbas M, Kamboh AA, Khan GJ, Shumzaid M, et al. Chlorogenic acid  
622 (CGA): A pharmacological review and call for further research. *Biomed Pharmacother.*  
623 2018; 97:67-74.
- 624 38- Liang N, Kitts DD. Role of chlorogenic acids in controlling oxidative and inflammatory  
625 stress conditions. *Nutrients.* 2015; 8(1):16. doi:10.3390/nu8010016
- 626 39- Zhang L, Chang C, Liu Y, Chen Z. Effect of chlorogenic acid on disordered glucose and lipid  
627 metabolism in db/db mice and its mechanism. *Acta Academiae Medicinae Sinicae* 2011;  
628 33(3):281–286.

- 629 40- Docampo M, Olubu A, Wang X, Pasinetti G, Dixon RA. Glucuronidated flavonoids in  
630 neurological protection: structural analysis and approaches for chemical and biological  
631 synthesis. *Journal of agricultural and food chemistry*. 2017; 65(35):7607–7623.
- 632 41- Ho L, Ferruzzi MG, Janle EM, Wang J, Gong B, Chen T-Y, et al. Identification of brain-  
633 targeted bioactive dietary quercetin-3-*O*-glucuronide as a novel intervention for  
634 Alzheimer’s disease. *FASEB J*. 2013; 27:769–781.
- 635 42- Lai CS, Wu JC, Ho CT, Pan MH. Disease chemopreventive effects and molecular  
636 mechanisms of hydroxylated polymethoxyflavones. *BioFactors*. 2015; 41(5):301–313.
- 637 43- Mersereau JE, Levy N, Staub RE, Baggett S, Zogovic T, Chow S, et al. Liquiritigenin is a  
638 plant-derived highly selective estrogen receptor beta agonist. *Mol Cell Endocrinol*. 2008;  
639 283(1-2):49-57.
- 640 44- Murata M, Nakai Y, Kawazu K, Ishizaka M, Kajiwara H, Abe H, et al. Loliolide, a  
641 carotenoid metabolite, is a potential endogenous inducer of herbivore resistance. *Plant*  
642 *Physiol*. 2019; 179(4):1822-1833.
- 643 45- Yun N, Kang JW, Lee SM. Protective effects of chlorogenic acid against  
644 ischemia/reperfusion injury in rat liver: molecular evidence of its antioxidant and anti-  
645 inflammatory properties. *J. Nutr. Biochem*. 2012; 23(10):1249–1255.
- 646 46- Islam MS, Iwasaki A, Suenaga K, Kato-Noguchi H. 2017. Isolation and identification of two  
647 potential phytotoxic substances from the aquatic fern *Marsilea crenata*. *J Plant Biol*.  
648 2017; 60:75–81.
- 649

bioRxiv preprint doi: <https://doi.org/10.1101/866178>; this version posted December 5, 2019. The copyright holder for this preprint (which was not certified by peer review) is the author/funder, who has granted bioRxiv a license to display the preprint in perpetuity. It is made available under aCC-BY 4.0 International license.

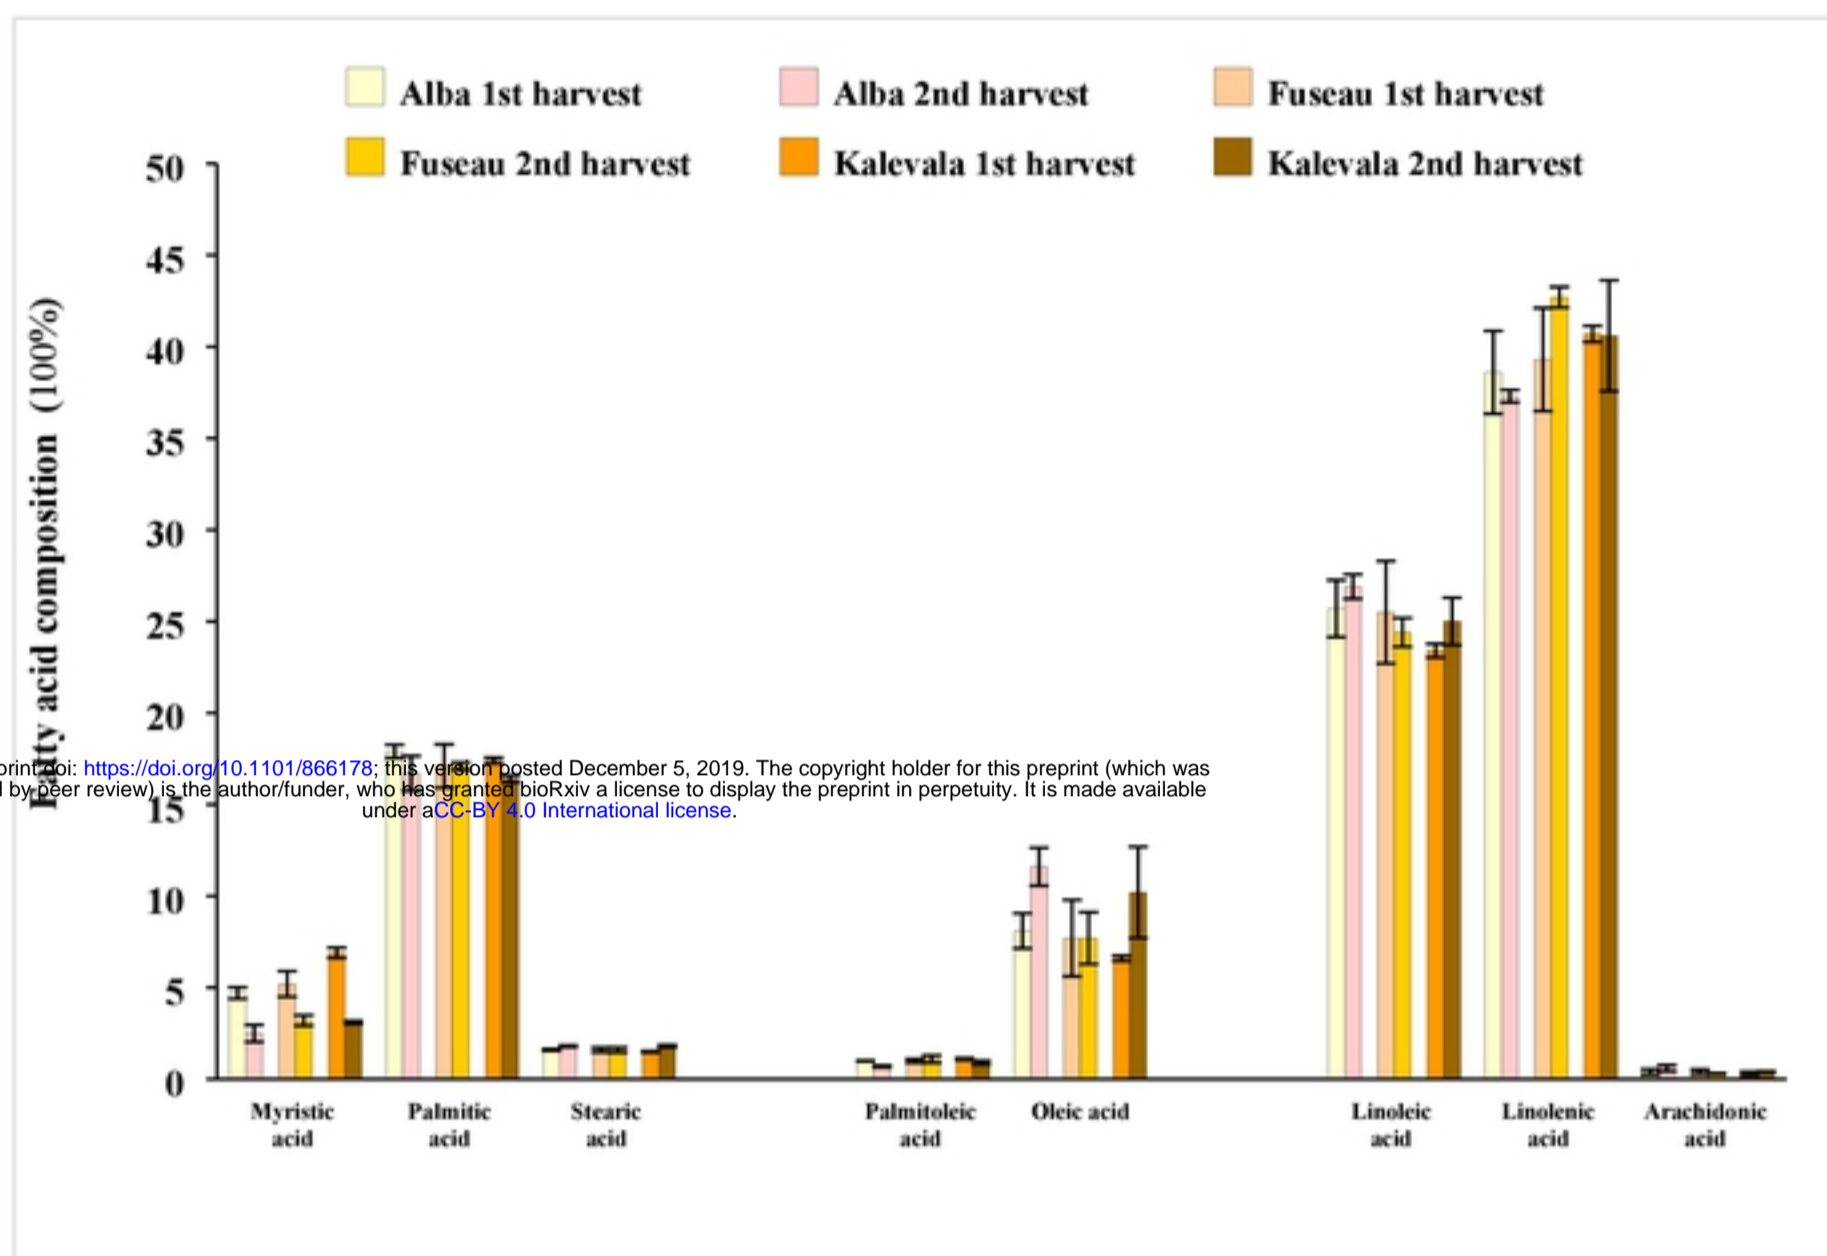

**Fig 1.** Fatty acid profile (100%) of Jerusalem artichoke leaf protein concentrate (JAPC) extracted from green biomass of different clones (Alba, Fuseau and Kalevala).

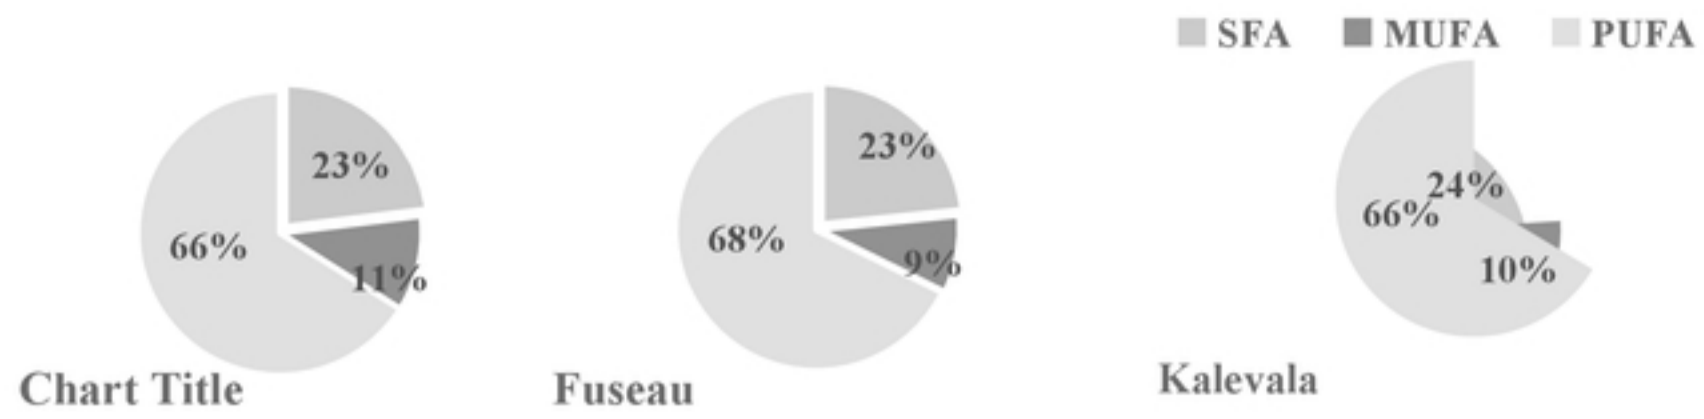

**Fig 2.** Distribution of saturated fatty acids (SFA), monounsaturated fatty acids (MUFA) and polyunsaturated fatty acids (PUFA) in Jerusalem artichoke leaf protein concentrate (JAPC) extracted from green biomass of different clones (Alba, Fuseau and Kalevala).

bioRxiv preprint doi: <https://doi.org/10.1101/866178>; this version posted December 5, 2019. The copyright holder for this preprint (which was not certified by peer review) is the author/funder, who has granted bioRxiv a license to display the preprint in perpetuity. It is made available under aCC-BY 4.0 International license.

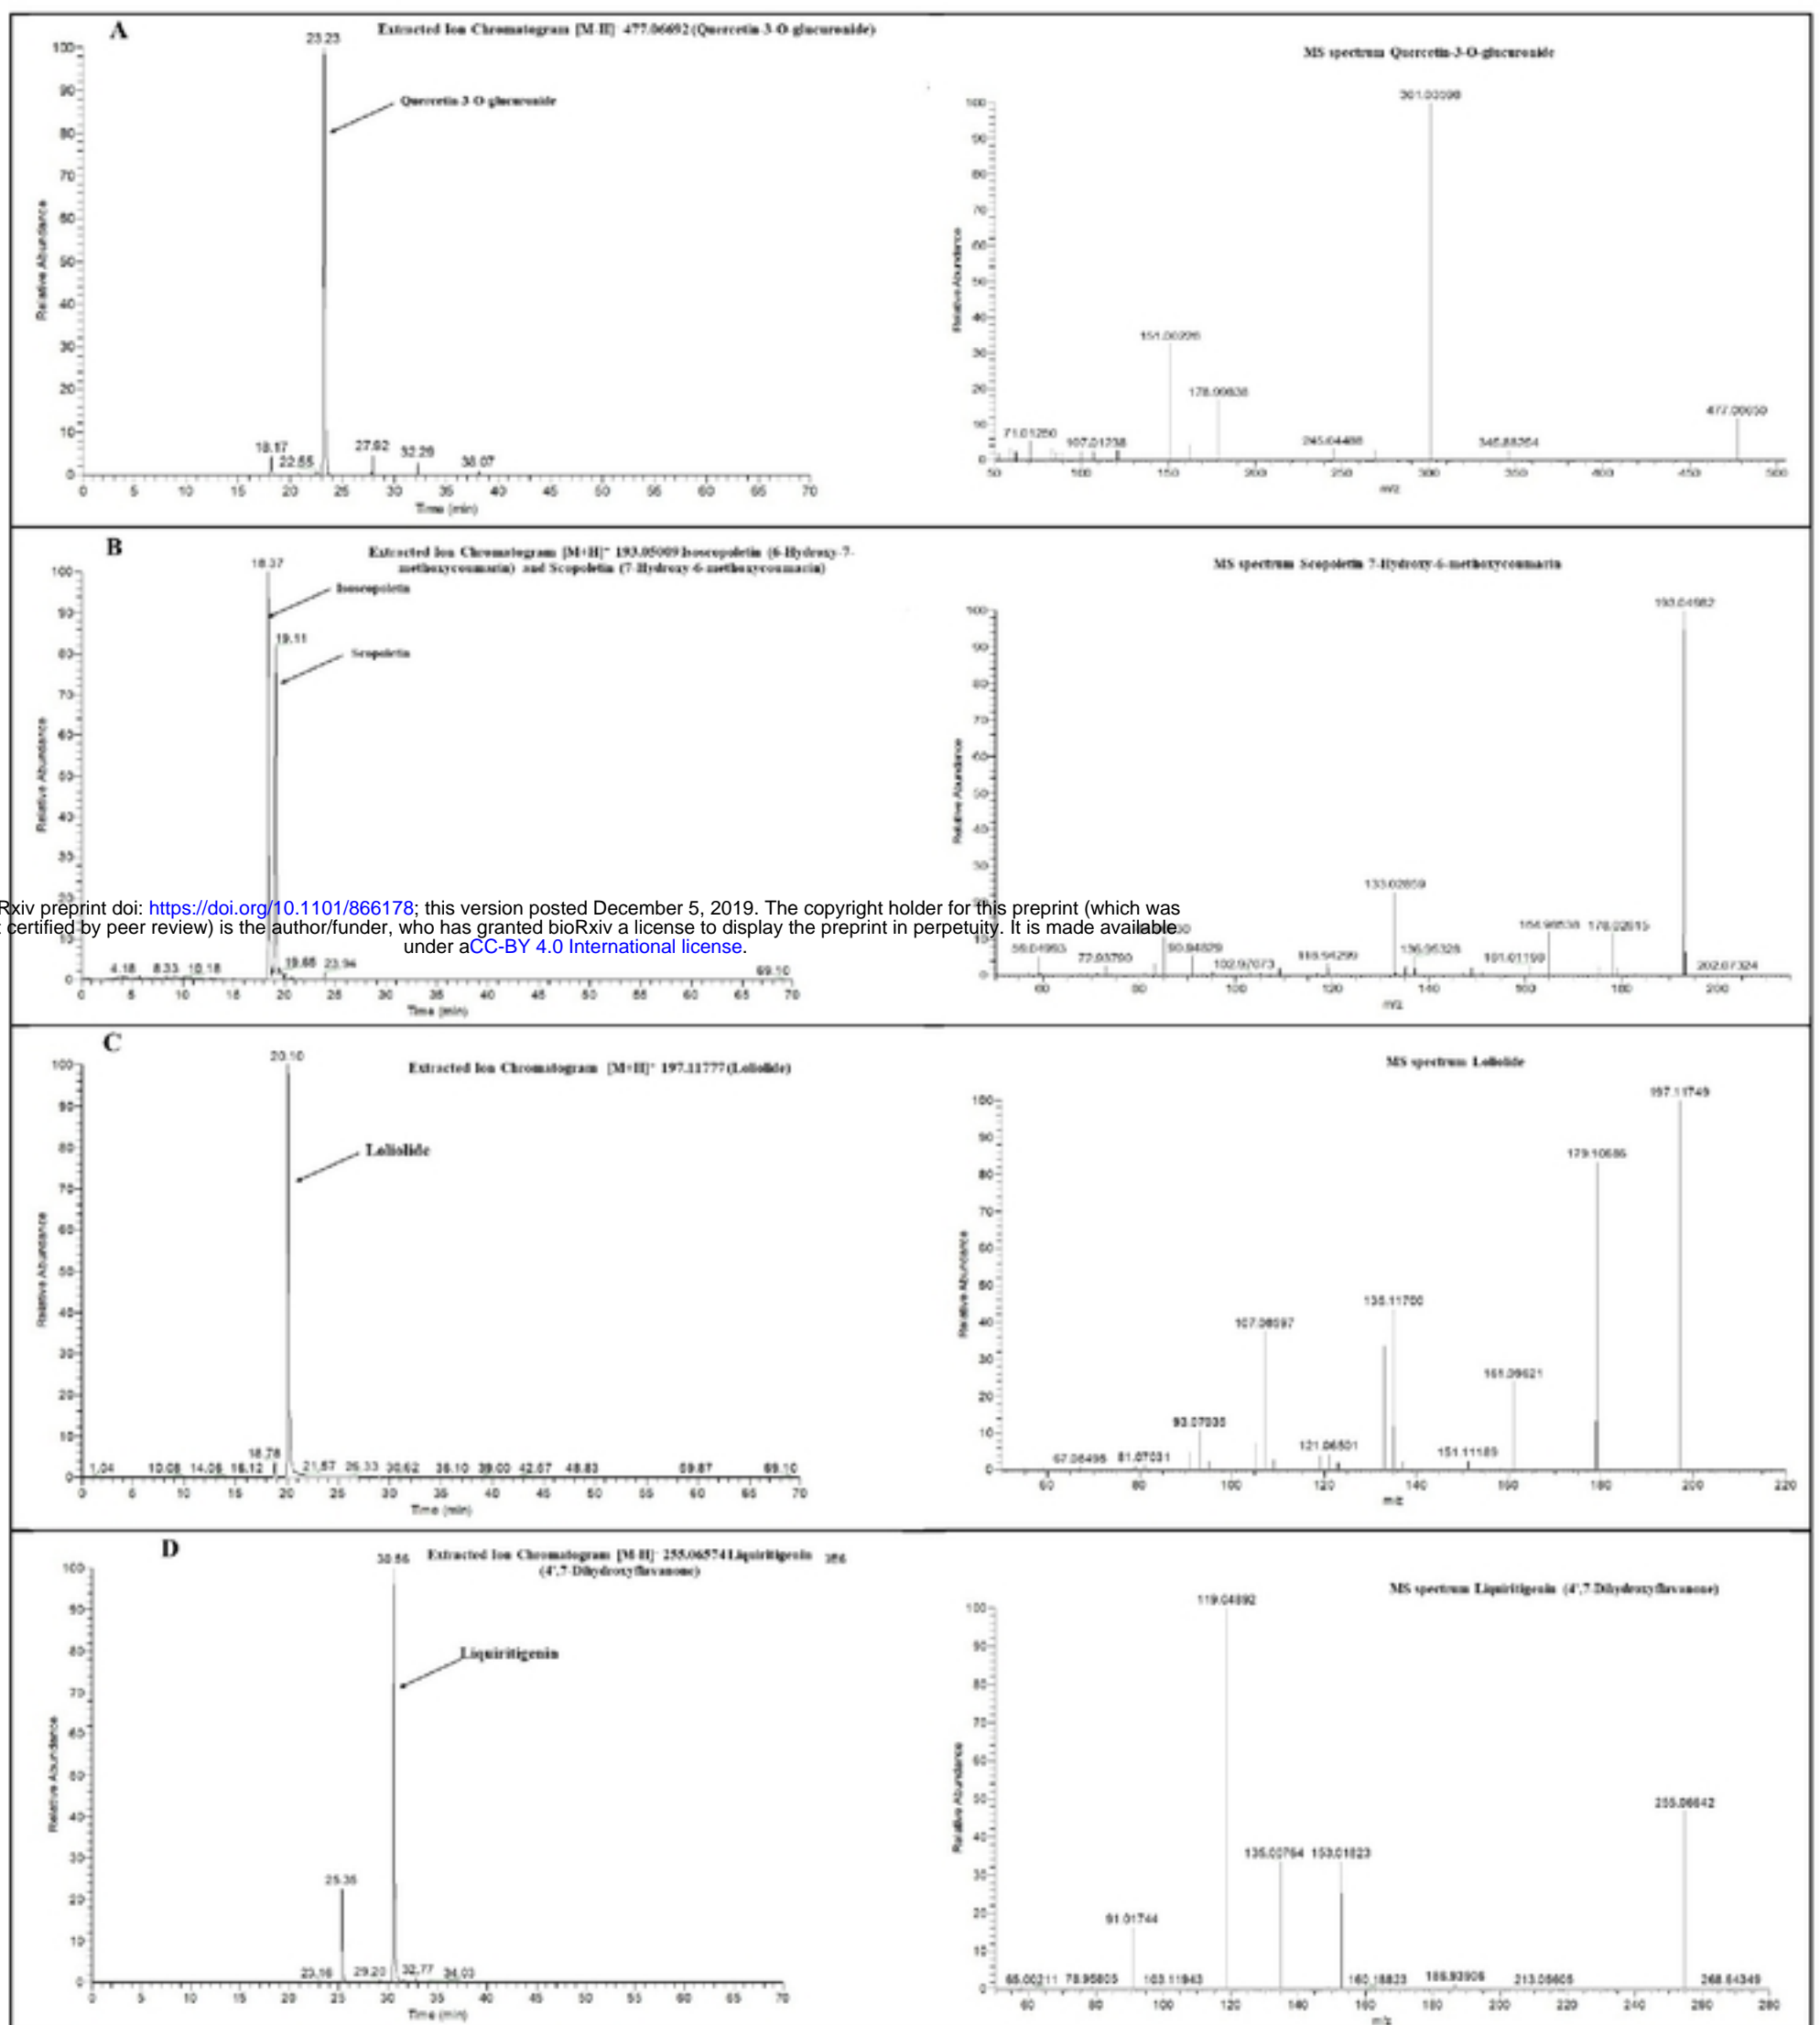

bioRxiv preprint doi: <https://doi.org/10.1101/866178>; this version posted December 5, 2019. The copyright holder for this preprint (which was not certified by peer review) is the author/funder, who has granted bioRxiv a license to display the preprint in perpetuity. It is made available under aCC-BY 4.0 International license.

**Fig 3.** Extracted Ion Chromatograms (XIC) and MS spectra of selected phytoconstituents from Jerusalem artichoke leaf protein concentrate: A: quercetin- 3-O-glucuronide; B: Scopoletin; C: Loliolide; D: Liquiritigenin



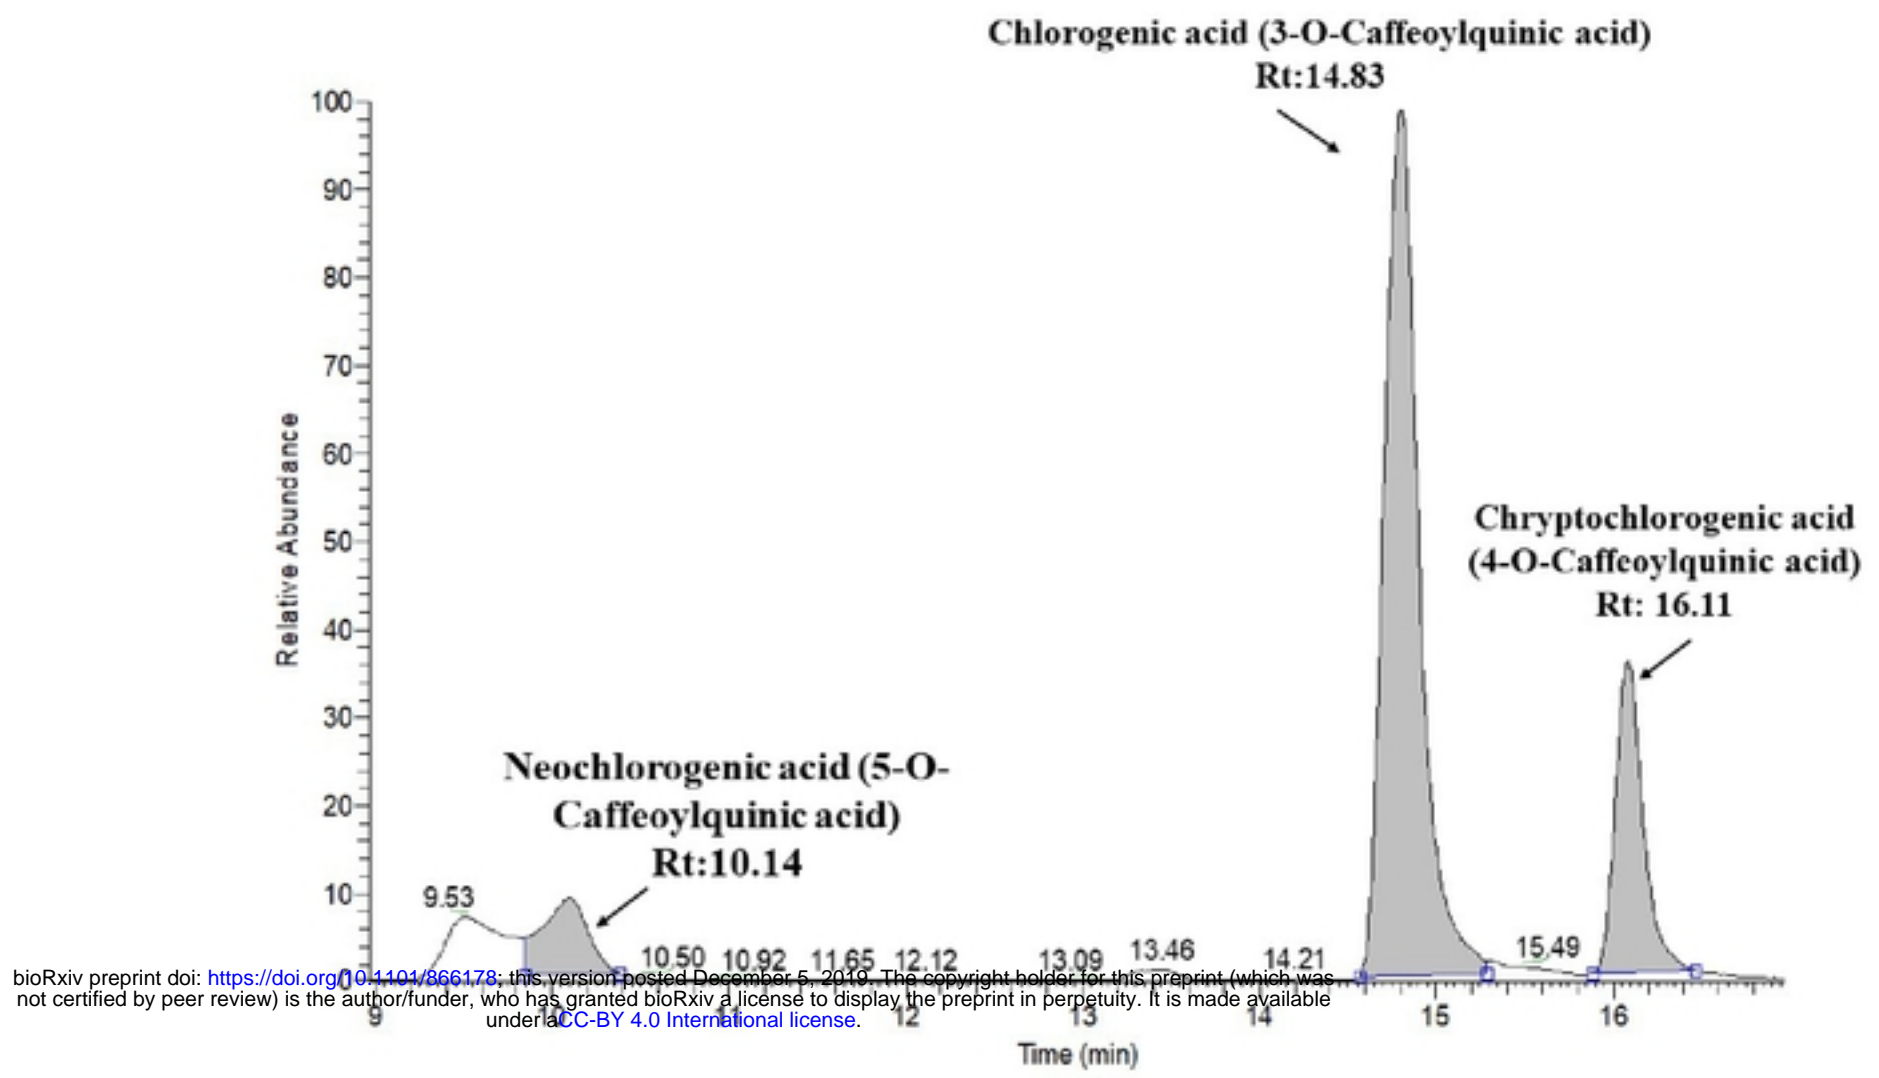

**Fig 4.** Extracted Ion Chromatoram of chlorogenic acid isomers

**Table 1.** Aboveground fresh biomass, dry mass and total protein content of Jerusalem artichoke leaf protein concentrate (JAPC) isolated from green biomass of different clones

| Clones          | Fresh Biomass yield (kg m <sup>-2</sup> ) |                               | JAPC (g kg <sup>-1</sup> fresh biomass) dry basis |                               | Total Protein %               |                               |
|-----------------|-------------------------------------------|-------------------------------|---------------------------------------------------|-------------------------------|-------------------------------|-------------------------------|
|                 | <i>1<sup>st</sup> harvest</i>             | <i>2<sup>nd</sup> harvest</i> | <i>1<sup>st</sup> harvest</i>                     | <i>2<sup>nd</sup> harvest</i> | <i>1<sup>st</sup> harvest</i> | <i>2<sup>nd</sup> harvest</i> |
| <b>Alba</b>     | 5.0±0.43 a                                | 1.8±0.22 b                    | 31.9±2.7 a                                        | 30.4±3.2 a                    | 35.3±0.8 a                    | 31.6±0.8 b                    |
| <b>Fuseau</b>   | 5.2±0.28 a                                | 2.6±0.19 ab                   | 28.3±1.9 a                                        | 28.8±2.8 a                    | 33.3±0.9 a                    | 35.2±0.8 a                    |
| <b>Kalevala</b> | 5.6±0.65 a                                | 2.8±0.57 a                    | 32.3±2.1 a                                        | 28.0±2.7 a                    | 33.8±0.7 a                    | 33.4±0.7 ab                   |

Means followed by different letters in the same column show significant differences according to Duncan's test at  $p < 0.05$ .

**Table 2.** Amino acid profile (m/m%) of Jerusalem artichoke leaf protein concentrate (JAPC) extracted from green biomass of different clones

|                      | <b>Alba</b>                   |                               | <b>Fuseau</b>                 |                               | <b>Kalevala</b>               |                               |
|----------------------|-------------------------------|-------------------------------|-------------------------------|-------------------------------|-------------------------------|-------------------------------|
|                      | <i>1<sup>st</sup> harvest</i> | <i>2<sup>nd</sup> harvest</i> | <i>1<sup>st</sup> harvest</i> | <i>2<sup>nd</sup> harvest</i> | <i>1<sup>st</sup> harvest</i> | <i>2<sup>nd</sup> harvest</i> |
| <b>Lysine</b>        | 2.32                          | 2.35                          | 2.19                          | 2.54                          | 2.25                          | 2.46                          |
| <b>Histidine</b>     | 0.80                          | 0.72                          | 0.71                          | 0.76                          | 0.83                          | 0.82                          |
| <b>Isoleucine</b>    | 1.72                          | 1.72                          | 1.64                          | 1.86                          | 1.77                          | 1.78                          |
| <b>Leucine</b>       | 3.25                          | 3.19                          | 3.08                          | 2.46                          | 3.31                          | 3.30                          |
| <b>Phenylalanine</b> | 2.12                          | 2.03                          | 1.96                          | 2.20                          | 2.19                          | 2.18                          |
| <b>Methionine</b>    | 0.87                          | 0.82                          | 0.84                          | 0.95                          | 0.79                          | 0.77                          |
| <b>Threonine</b>     | 1.96                          | 1.95                          | 1.87                          | 2.12                          | 2.33                          | 2.33                          |
| <b>Valine</b>        | 2.05                          | 2.10                          | 2.02                          | 2.34                          | 2.06                          | 2.09                          |
| <b>Alanine</b>       | 2.36                          | 2.32                          | 2.20                          | 2.47                          | 2.35                          | 2.34                          |
| <b>Arginine</b>      | 2.08                          | 1.87                          | 1.88                          | 1.97                          | 1.86                          | 2.21                          |
| <b>Aspartic acid</b> | 3.81                          | 3.89                          | 3.63                          | 4.23                          | 4.23                          | 4.24                          |
| <b>Cysteine</b>      | 0.24                          | 0.24                          | 0.22                          | 0.26                          | 0.22                          | 0.23                          |
| <b>Glycine</b>       | 2.04                          | 1.99                          | 1.93                          | 2.14                          | 2.13                          | 2.14                          |
| <b>Glutamic acid</b> | 4.29                          | 4.38                          | 4.14                          | 4.74                          | 4.82                          | 4.79                          |
| <b>Proline</b>       | 1.92                          | 2.04                          | 1.82                          | 2.18                          | 2.20                          | 2.19                          |
| <b>Serine</b>        | 1.74                          | 1.77                          | 1.67                          | 1.89                          | 1.90                          | 1.93                          |
| <b>Tyrosine</b>      | 1.48                          | 1.42                          | 1.38                          | 1.61                          | 1.46                          | 1.55                          |
| <b>Ammonia</b>       | 0.49                          | 0.52                          | 0.47                          | 0.48                          | 0.52                          | 0.54                          |

bioRxiv preprint doi: <https://doi.org/10.1101/866178>; this version posted December 5, 2019. The copyright holder for this preprint (which was not certified by peer review) is the author/funder, who has granted bioRxiv a license to display the preprint in perpetuity. It is made available under aCC-BY 4.0 International license.

**Table 3.** Chemical composition of Jerusalem artichoke leaf protein concentrate (JAPC) extracted from green biomass

| No. | Compound                                         | Formula    | Retention time | [M + H] <sup>+</sup> | [M - H] <sup>-</sup> | Fragmens 1 | Fragmens 2 | Fragmens 3 | Fragmens 4 | Fragmens 5 |
|-----|--------------------------------------------------|------------|----------------|----------------------|----------------------|------------|------------|------------|------------|------------|
| 1   | Lysine                                           | C6H14N2O2  | 1,12           | 147,11336            |                      | 130,0866   | 84,0814    | 67,0547    | 56,0503    |            |
| 2   | γ-Aminobutyric acid                              | C4H9NO2    | 1,25           | 104,07116            |                      | 87,0446    | 86,0607    | 69,0342    | 58,0658    |            |
| 3   | Quinic acid                                      | C7H12O6    | 1,27           |                      | 191,05557            | 173,0447   | 171,0289   | 127,0388   | 93,0331    | 85,0280    |
| 4   | Betaine (Trimethylglycine)                       | C5H11NO2   | 1,28           | 118,08681            |                      | 59,0737    | 58,0659    |            |            |            |
| 5   | Proline                                          | C5H9NO2    | 1,28           | 116,07116            |                      | 70,0658    | 68,0500    |            |            |            |
| 6   | Glutamic acid                                    | C5H9NO4    | 1,32           | 148,06099            |                      | 130,0502   | 102,0555   | 84,0450    | 56,0502    |            |
| 7   | Glutamine                                        | C5H10N2O3  | 1,32           | 147,07697            |                      | 130,0502   | 102,0554   | 101,0716   | 84,0450    | 56,0502    |
| 8   | Malic acid                                       | C4H6O5     | 1,33           |                      | 133,01370            | 115,0024   | 89,0230    | 87,0075    | 72,9916    | 71,0123    |
| 9   | Nicotinic acid (Niacin)                          | C6H5NO2    | 1,51           | 124,03986            |                      | 96,0450    | 80,0501    | 78,0347    |            |            |
| 10  | Citric acid                                      | C6H8O7     | 1,73           |                      | 191,01918            | 173,0082   | 129,0182   | 111,0075   | 87,0073    | 85,0280    |
| 11  | Leucine and Isoleucine                           | C6H13NO2   | 1,84           | 132,10246            |                      | 86,0970    | 69,0706    |            |            |            |
| 12  | Tyrosine                                         | C9H11NO3   | 1,93           | 182,08172            |                      | 165,0548   | 147,0443   | 136,0759   | 123,0444   | 119,0495   |
| 13  | Phenylalanine                                    | C9H11NO2   | 3,64           | 166,08681            |                      | 149,0598   | 131,0495   | 120,0811   | 107,0496   | 103,0547   |
| 14  | Tryptophan                                       | C11H12N2O2 | 9,38           | 205,09771            |                      | 188,0709   | 170,0602   | 159,0919   | 146,0602   | 118,0655   |
| 15  | Neochlorogenic acid (5-O-Caffeoylquinic acid)    | C16H18O9   | 10,14          |                      | 353,08726            | 191,0557   | 179,0344   | 173,0448   | 135,0441   |            |
| 16  | Salicylic acid-2-O-glucoside                     | C13H16O8   | 13,56          |                      | 299,07670            | 137,0234   | 113,0229   | 93,0331    | 85,0280    | 71,0123    |
| 17  | Chlorogenic acid (3-O-Caffeoylquinic acid)       | C16H18O9   | 14,83          |                      | 353,08726            | 191,0556   | 179,0344   | 173,0443   | 161,0234   | 135,0441   |
| 18  | Chrysochlorogenic acid (4-O-Caffeoylquinic acid) | C16H18O9   | 16,11          |                      | 353,08726            | 191,0555   | 179,0344   | 173,0447   | 161,0232   | 135,0441   |
| 19  | 4-O-(4-Coumaroyl)quinic acid                     | C16H18O8   | 16,14          |                      | 337,09235            | 191,0555   | 173,0447   | 163,0390   | 119,0489   | 93,0331    |
| 20  | Vanillin                                         | C8H8O3     | 16,22          | 153,05517            |                      | 125,0600   | 111,0445   | 110,0366   | 93,0341    | 65,0393    |
| 21  | 5-O-(4-Coumaroyl)quinic acid                     | C16H18O8   | 17,38          |                      | 337,09235            | 191,0556   | 173,0447   | 163,0391   | 119,0490   | 93,0332    |
| 22  | Indole-3-acetic acid                             | C10H9NO2   | 17,98          |                      | 174,05551            | 146,0601   | 144,0440   | 130,0651   | 128,0492   |            |
| 23  | 4-O-(4-Coumaroyl)quinic acid cis isomer          | C16H18O8   | 18,04          |                      | 337,09235            | 191,0556   | 173,0447   | 163,0391   | 119,0489   | 93,0331    |

|    |                                                        |            |       |           |          |          |          |          |          |
|----|--------------------------------------------------------|------------|-------|-----------|----------|----------|----------|----------|----------|
| 24 | Isoscopoletin (6-Hydroxy-7-methoxycoumarin)            | C10H8O4    | 18,33 | 193,05009 | 178,0264 | 165,0550 | 149,0598 | 137,0600 | 133,0287 |
| 25 | 5-O-Feruloylquinic acid                                | C17H20O9   | 18,42 | 367,10291 | 193,0503 | 191,0556 | 173,0447 | 134,0362 | 93,0331  |
| 26 | Riboflavin                                             | C17H20N4O6 | 19,03 | 377,14611 | 359,1352 | 243,0879 | 200,0824 | 172,0872 | 69,0342  |
| 27 | Scopoletin (7-Hydroxy-6-methoxycoumarin)               | C10H8O4    | 19,08 | 193,05009 | 178,0263 | 165,0546 | 149,0597 | 137,0601 | 133,0287 |
| 28 | Azelaamic acid (9-Amino-9-oxononanoic acid)            | C9H17NO3   | 19,21 | 186,11302 | 125,0959 | 97,0647  |          |          |          |
| 29 | 6-Methylcoumarin                                       | C10H8O2    | 19,44 | 161,06026 | 133,0651 | 115,0547 | 105,0704 | 91,0547  | 79,0549  |
| 30 | 5-O-(4-Coumaroyl)quinic acid cis isomer                | C16H18O8   | 19,63 | 337,09235 | 191,0555 | 173,0446 | 163,0390 | 119,0491 | 93,0330  |
| 31 | Indole-4-carbaldehyde                                  | C9H7NO     | 19,67 | 146,06059 | 118,0655 | 117,0574 | 91,0548  |          |          |
| 32 | Fraxidin vagy Isofraxidin                              | C11H10O5   | 19,72 | 221,04500 | 206,0219 | 190,9983 | 163,0030 |          |          |
| 33 | Loliolide                                              | C11H16O3   | 20,05 | 197,11777 | 179,1069 | 161,0962 | 135,1171 | 133,1015 | 107,0860 |
| 34 | 4-Hydroxy-3-methoxycinnamaldehyde (Coniferyl aldehyde) | C10H10O3   | 20,59 | 179,07082 | 161,0599 | 147,0442 | 133,0652 | 119,0495 | 55,0186  |
| 35 | 7-Deoxyloganic acid isomer                             | C16H24O9   | 22,36 | 359,13421 | 197,0815 | 153,0909 | 135,0805 | 109,0643 | 89,0230  |
| 36 | Di-O-caffeoylquinic acid isomer 1                      | C25H24O12  | 22,61 | 515,11896 | 353,0884 | 191,0556 | 179,0342 | 173,0447 | 135,0441 |
| 37 | Di-O-caffeoylquinic acid isomer 2                      | C25H24O12  | 22,77 | 515,11896 | 353,0884 | 191,0556 | 179,0342 | 173,0446 | 135,0440 |
| 38 | Salvianolic acid derivative isomer 1                   | C27H22O12  | 22,80 | 537,10331 | 375,0705 | 201,0165 | 179,0343 | 161,0234 | 135,0440 |
| 39 | Butein (2',3,4,4'-Tetrahydroxychalcone)                | C15H12O5   | 23,00 | 273,07630 | 255,0656 | 227,0699 | 209,0602 | 163,0391 | 137,0235 |
| 40 | Quercetin-3-O-glucuronide                              | C21H18O13  | 23,26 | 477,06692 | 301,0359 | 178,9980 | 163,0028 | 151,0026 | 121,0281 |
| 41 | Isoquercitrin (Hirsutrin, Quercetin-3-O-glucoside)     | C21H20O12  | 23,47 | 463,08765 | 301,0358 | 300,0283 | 271,0253 | 255,0300 |          |
| 42 | Chrysoeriol-O-glucoside                                | C22H22O11  | 23,87 | 461,10839 | 299,0560 | 298,0484 | 270,0537 | 255,0292 | 227,0346 |
| 43 | Salvianolic acid derivative isomer 2                   | C27H22O12  | 24,60 | 537,10331 | 375,0705 | 201,0166 | 179,0343 | 161,0236 | 135,0440 |

|    |                                                         |           |       |           |           |          |          |          |          |          |
|----|---------------------------------------------------------|-----------|-------|-----------|-----------|----------|----------|----------|----------|----------|
| 44 | Di-O-caffeoylquinic acid isomer 3                       | C25H24O12 | 24,62 |           | 515,11896 | 353,0884 | 191,0557 | 179,0342 | 173,0447 | 135,0440 |
| 45 | Azelaic acid                                            | C9H16O4   | 25,05 |           | 187,09704 | 169,0863 | 143,1070 | 125,0959 | 123,0803 |          |
| 46 | Kaempferol-3-O-glucuronide                              | C21H18O12 | 25,18 |           | 461,07200 | 285,0410 | 229,0505 | 113,0231 |          |          |
| 47 | Apigenin-O-malonylglucoside                             | C24H22O13 | 25,21 |           | 517,09822 | 473,1116 | 269,0461 | 268,0376 |          |          |
| 48 | Astragalin (Kaempferol-3-O-glucoside)                   | C21H20O11 | 25,26 |           | 447,09274 | 285,0410 | 284,0331 | 255,0302 | 227,0350 |          |
| 49 | Isorhamnetin-3-O-glucoside                              | C22H22O12 | 25,48 |           | 477,10330 | 315,0524 | 314,0437 | 285,0406 | 271,0248 | 243,0292 |
| 50 | Kukulkanin B (3'-Methoxy-2',4,4'-methoxychalcone)       | C16H14O5  | 25,50 | 287,09195 |           | 269,0810 | 241,0864 | 177,0548 | 145,0286 | 137,0235 |
| 51 | Isorhamnetin-3-O-glucuronide                            | C22H20O13 | 25,70 |           | 491,08257 | 315,0517 | 300,0275 | 271,0249 |          |          |
| 52 | Dihydroactinidiolide                                    | C11H16O2  | 27,16 | 181,12286 |           | 163,1119 | 145,1014 | 135,1171 | 121,1015 | 107,0860 |
| 53 | Dimethoxy-tetrahydroxyflavone                           | C17H14O8  | 28,38 |           | 345,06105 | 330,0386 | 315,0153 | 287,0204 | 215,0347 | 178,9978 |
| 54 | Dihydroxy-methoxyflavone                                | C16H12O5  | 29,89 |           | 283,06065 | 268,0381 | 267,0305 | 240,0427 | 239,0350 | 211,0396 |
| 55 | Dimethoxy-trihydroxyflavone isomer 1                    | C17H14O7  | 30,09 |           | 329,06613 | 314,0439 | 299,0197 | 283,0869 | 271,0247 | 255,0913 |
| 56 | Trihydroxy-trimethoxyflavone                            | C18H16O8  | 30,36 |           | 359,07670 | 344,0541 | 329,0307 | 314,0075 | 301,0358 | 286,0129 |
| 57 | Dimethoxy-trihydroxyflavone isomer 2                    | C17H14O7  | 30,38 |           | 329,06613 | 314,0439 | 299,0201 | 283,0871 | 271,0252 | 253,0763 |
| 58 | Liquiritigenin (4',7-Dihydroxyflavanone)                | C15H12O4  | 30,56 |           | 255,06574 | 153,0183 | 135,0077 | 119,0489 | 91,0175  |          |
| 59 | Hymenoxin (5,7-Dihydroxy-3',4',6,8-tetramethoxyflavone) | C19H18O8  | 32,11 | 375,10800 |           | 360,0840 | 345,0606 | 342,0736 | 330,0367 | 317,0659 |
| 60 | Epiatzelechin trimethyl ether                           | C18H20O5  | 33,32 | 317,13890 |           | 167,0704 | 163,0755 | 155,0705 | 137,0598 | 121,0651 |
| 61 | Nevadensin (5,7-Dihydroxy-4',6,8-trimethoxyflavone)     | C18H16O7  | 33,91 | 345,09743 |           | 330,0736 | 315,0501 | 312,0631 | 287,0554 |          |
